# Supplementary material for: Causal Linkage Between Inflammatory Bowel Disease and Primary Sclerosing Cholangitis: A Two-Sample Mendelian Randomization Analysis
Source: Front Genet. 2021 Mar 18;12:649376. doi: 10.3389/fgene.2021.649376 (PMC8012893; doi:10.3389/fgene.2021.649376)
Supplement: Supplementary file 2 [file Data_Sheet_2.xlsx]

## Sheet: Table S1
Table S1. Characteristics of single SNPs used in the Mendelian randomization analysis of the effects of IBD on PSC.
	exposure	outcome	id.exposure	id.outcome	samplesize	SNP	b	se	p
1	Inflammatory bowel disease || id:ieu-a-294	Primary sclerosing cholangitis || id:ieu-a-1112	ieu-a-294	ieu-a-1112	14890	rs10142466	0.576408	0.534433	0.280792
2	Inflammatory bowel disease || id:ieu-a-294	Primary sclerosing cholangitis || id:ieu-a-1112	ieu-a-294	ieu-a-1112	14890	rs10758669	0.385348	0.241997	0.111303
3	Inflammatory bowel disease || id:ieu-a-294	Primary sclerosing cholangitis || id:ieu-a-1112	ieu-a-294	ieu-a-1112	14890	rs10800309	0.318681	0.272498	0.242211
4	Inflammatory bowel disease || id:ieu-a-294	Primary sclerosing cholangitis || id:ieu-a-1112	ieu-a-294	ieu-a-1112	14890	rs11152949	-0.0379986	0.35219	0.914081
5	Inflammatory bowel disease || id:ieu-a-294	Primary sclerosing cholangitis || id:ieu-a-1112	ieu-a-294	ieu-a-1112	14890	rs11230563	0.376003	0.394118	0.340065
6	Inflammatory bowel disease || id:ieu-a-294	Primary sclerosing cholangitis || id:ieu-a-1112	ieu-a-294	ieu-a-1112	14890	rs11677953	1.15952	0.379476	0.00224631
7	Inflammatory bowel disease || id:ieu-a-294	Primary sclerosing cholangitis || id:ieu-a-1112	ieu-a-294	ieu-a-1112	14890	rs11691685	0.0893294	0.440935	0.839455
8	Inflammatory bowel disease || id:ieu-a-294	Primary sclerosing cholangitis || id:ieu-a-1112	ieu-a-294	ieu-a-1112	14890	rs11713774	0.0317705	0.466666	0.945722
9	Inflammatory bowel disease || id:ieu-a-294	Primary sclerosing cholangitis || id:ieu-a-1112	ieu-a-294	ieu-a-1112	14890	rs11793497	0.480823	0.230465	0.0369497
10	Inflammatory bowel disease || id:ieu-a-294	Primary sclerosing cholangitis || id:ieu-a-1112	ieu-a-294	ieu-a-1112	14890	rs1182188	-0.0756802	0.500737	0.879867
11	Inflammatory bowel disease || id:ieu-a-294	Primary sclerosing cholangitis || id:ieu-a-1112	ieu-a-294	ieu-a-1112	14890	rs12103	-0.639124	0.518819	0.217993
12	Inflammatory bowel disease || id:ieu-a-294	Primary sclerosing cholangitis || id:ieu-a-1112	ieu-a-294	ieu-a-1112	14890	rs12318183	0.358079	0.283025	0.205805
13	Inflammatory bowel disease || id:ieu-a-294	Primary sclerosing cholangitis || id:ieu-a-1112	ieu-a-294	ieu-a-1112	14890	rs12411259	-0.148722	0.523127	0.776184
14	Inflammatory bowel disease || id:ieu-a-294	Primary sclerosing cholangitis || id:ieu-a-1112	ieu-a-294	ieu-a-1112	14890	rs1250566	-0.069138	0.366722	0.850461
15	Inflammatory bowel disease || id:ieu-a-294	Primary sclerosing cholangitis || id:ieu-a-1112	ieu-a-294	ieu-a-1112	14890	rs12585310	0.71754	0.467101	0.1245
16	Inflammatory bowel disease || id:ieu-a-294	Primary sclerosing cholangitis || id:ieu-a-1112	ieu-a-294	ieu-a-1112	14890	rs1267499	-0.312471	0.474774	0.510444
17	Inflammatory bowel disease || id:ieu-a-294	Primary sclerosing cholangitis || id:ieu-a-1112	ieu-a-294	ieu-a-1112	14890	rs12718244	0.0131218	0.40698	0.974279
18	Inflammatory bowel disease || id:ieu-a-294	Primary sclerosing cholangitis || id:ieu-a-1112	ieu-a-294	ieu-a-1112	14890	rs12722515	0.972869	0.434773	0.025244
19	Inflammatory bowel disease || id:ieu-a-294	Primary sclerosing cholangitis || id:ieu-a-1112	ieu-a-294	ieu-a-1112	14890	rs1292053	0.21238	0.442203	0.63103
20	Inflammatory bowel disease || id:ieu-a-294	Primary sclerosing cholangitis || id:ieu-a-1112	ieu-a-294	ieu-a-1112	14890	rs1297258	0.215611	0.279417	0.440325
21	Inflammatory bowel disease || id:ieu-a-294	Primary sclerosing cholangitis || id:ieu-a-1112	ieu-a-294	ieu-a-1112	14890	rs13107612	0.639996	0.436824	0.14289
22	Inflammatory bowel disease || id:ieu-a-294	Primary sclerosing cholangitis || id:ieu-a-1112	ieu-a-294	ieu-a-1112	14890	rs13204742	-1.01046	0.567557	0.0750156
23	Inflammatory bowel disease || id:ieu-a-294	Primary sclerosing cholangitis || id:ieu-a-1112	ieu-a-294	ieu-a-1112	14890	rs13407913	-0.0326638	0.327128	0.920463
24	Inflammatory bowel disease || id:ieu-a-294	Primary sclerosing cholangitis || id:ieu-a-1112	ieu-a-294	ieu-a-1112	14890	rs1363907	-0.398358	0.368086	0.279146
25	Inflammatory bowel disease || id:ieu-a-294	Primary sclerosing cholangitis || id:ieu-a-1112	ieu-a-294	ieu-a-1112	14890	rs1388585	0.0745826	0.347666	0.830139
26	Inflammatory bowel disease || id:ieu-a-294	Primary sclerosing cholangitis || id:ieu-a-1112	ieu-a-294	ieu-a-1112	14890	rs1420098	0.511991	0.325305	0.115516
27	Inflammatory bowel disease || id:ieu-a-294	Primary sclerosing cholangitis || id:ieu-a-1112	ieu-a-294	ieu-a-1112	14890	rs1517352	0.354579	0.41088	0.388151
28	Inflammatory bowel disease || id:ieu-a-294	Primary sclerosing cholangitis || id:ieu-a-1112	ieu-a-294	ieu-a-1112	14890	rs1569328	0.484372	0.580446	0.404009
29	Inflammatory bowel disease || id:ieu-a-294	Primary sclerosing cholangitis || id:ieu-a-1112	ieu-a-294	ieu-a-1112	14890	rs17293632	0.28488	0.382588	0.456505
30	Inflammatory bowel disease || id:ieu-a-294	Primary sclerosing cholangitis || id:ieu-a-1112	ieu-a-294	ieu-a-1112	14890	rs17651741	-0.0426422	0.569414	0.940304
31	Inflammatory bowel disease || id:ieu-a-294	Primary sclerosing cholangitis || id:ieu-a-1112	ieu-a-294	ieu-a-1112	14890	rs17780256	0.33101	0.479461	0.489955
32	Inflammatory bowel disease || id:ieu-a-294	Primary sclerosing cholangitis || id:ieu-a-1112	ieu-a-294	ieu-a-1112	14890	rs181826	0.241364	0.377844	0.522957
33	Inflammatory bowel disease || id:ieu-a-294	Primary sclerosing cholangitis || id:ieu-a-1112	ieu-a-294	ieu-a-1112	14890	rs1847472	-1.68443	0.475621	0.000397812
34	Inflammatory bowel disease || id:ieu-a-294	Primary sclerosing cholangitis || id:ieu-a-1112	ieu-a-294	ieu-a-1112	14890	rs1990760	1.18803	0.506592	0.0190196
35	Inflammatory bowel disease || id:ieu-a-294	Primary sclerosing cholangitis || id:ieu-a-1112	ieu-a-294	ieu-a-1112	14890	rs2024092	-0.677078	0.411935	0.100248
36	Inflammatory bowel disease || id:ieu-a-294	Primary sclerosing cholangitis || id:ieu-a-1112	ieu-a-294	ieu-a-1112	14890	rs2050392	0.539598	0.44851	0.228941
37	Inflammatory bowel disease || id:ieu-a-294	Primary sclerosing cholangitis || id:ieu-a-1112	ieu-a-294	ieu-a-1112	14890	rs2143178	0.265353	0.232053	0.25283
38	Inflammatory bowel disease || id:ieu-a-294	Primary sclerosing cholangitis || id:ieu-a-1112	ieu-a-294	ieu-a-1112	14890	rs2153283	0.16173	0.430414	0.7071
39	Inflammatory bowel disease || id:ieu-a-294	Primary sclerosing cholangitis || id:ieu-a-1112	ieu-a-294	ieu-a-1112	14890	rs2270395	0.89318	0.526714	0.0899316
40	Inflammatory bowel disease || id:ieu-a-294	Primary sclerosing cholangitis || id:ieu-a-1112	ieu-a-294	ieu-a-1112	14890	rs2274351	0.680039	0.479344	0.155991
41	Inflammatory bowel disease || id:ieu-a-294	Primary sclerosing cholangitis || id:ieu-a-1112	ieu-a-294	ieu-a-1112	14890	rs2297559	0.887034	0.444948	0.0461994
42	Inflammatory bowel disease || id:ieu-a-294	Primary sclerosing cholangitis || id:ieu-a-1112	ieu-a-294	ieu-a-1112	14890	rs2328546	-0.619775	0.393549	0.115295
43	Inflammatory bowel disease || id:ieu-a-294	Primary sclerosing cholangitis || id:ieu-a-1112	ieu-a-294	ieu-a-1112	14890	rs2395022	0.35704	0.45696	0.434604
44	Inflammatory bowel disease || id:ieu-a-294	Primary sclerosing cholangitis || id:ieu-a-1112	ieu-a-294	ieu-a-1112	14890	rs2497318	1.45688	0.456359	0.00141102
45	Inflammatory bowel disease || id:ieu-a-294	Primary sclerosing cholangitis || id:ieu-a-1112	ieu-a-294	ieu-a-1112	14890	rs2538470	0.191181	0.518059	0.712102
46	Inflammatory bowel disease || id:ieu-a-294	Primary sclerosing cholangitis || id:ieu-a-1112	ieu-a-294	ieu-a-1112	14890	rs259964	1.26389	0.504014	0.012154
47	Inflammatory bowel disease || id:ieu-a-294	Primary sclerosing cholangitis || id:ieu-a-1112	ieu-a-294	ieu-a-1112	14890	rs2688608	-0.0160169	0.480746	0.973422
48	Inflammatory bowel disease || id:ieu-a-294	Primary sclerosing cholangitis || id:ieu-a-1112	ieu-a-294	ieu-a-1112	14890	rs272882	-0.0539363	0.192635	0.779484
49	Inflammatory bowel disease || id:ieu-a-294	Primary sclerosing cholangitis || id:ieu-a-1112	ieu-a-294	ieu-a-1112	14890	rs2836883	1.79075	0.243449	1.9e-13
50	Inflammatory bowel disease || id:ieu-a-294	Primary sclerosing cholangitis || id:ieu-a-1112	ieu-a-294	ieu-a-1112	14890	rs2847278	0.80264	0.276763	0.00373044
51	Inflammatory bowel disease || id:ieu-a-294	Primary sclerosing cholangitis || id:ieu-a-1112	ieu-a-294	ieu-a-1112	14890	rs2974935	-0.230966	0.509272	0.650172
52	Inflammatory bowel disease || id:ieu-a-294	Primary sclerosing cholangitis || id:ieu-a-1112	ieu-a-294	ieu-a-1112	14890	rs3024493	0.0756066	0.238673	0.751412
53	Inflammatory bowel disease || id:ieu-a-294	Primary sclerosing cholangitis || id:ieu-a-1112	ieu-a-294	ieu-a-1112	14890	rs3184504	3.10636	0.499736	5.1e-10
54	Inflammatory bowel disease || id:ieu-a-294	Primary sclerosing cholangitis || id:ieu-a-1112	ieu-a-294	ieu-a-1112	14890	rs34779708	0.581515	0.290591	0.0453771
55	Inflammatory bowel disease || id:ieu-a-294	Primary sclerosing cholangitis || id:ieu-a-1112	ieu-a-294	ieu-a-1112	14890	rs34804116	1.33931	0.609087	0.027886
56	Inflammatory bowel disease || id:ieu-a-294	Primary sclerosing cholangitis || id:ieu-a-1112	ieu-a-294	ieu-a-1112	14890	rs35164067	0.511774	0.374341	0.171583
57	Inflammatory bowel disease || id:ieu-a-294	Primary sclerosing cholangitis || id:ieu-a-1112	ieu-a-294	ieu-a-1112	14890	rs35256947	0.395148	0.498998	0.428429
58	Inflammatory bowel disease || id:ieu-a-294	Primary sclerosing cholangitis || id:ieu-a-1112	ieu-a-294	ieu-a-1112	14890	rs3776414	-0.243265	0.413588	0.556411
59	Inflammatory bowel disease || id:ieu-a-294	Primary sclerosing cholangitis || id:ieu-a-1112	ieu-a-294	ieu-a-1112	14890	rs3801835	0.186073	0.499165	0.709321
60	Inflammatory bowel disease || id:ieu-a-294	Primary sclerosing cholangitis || id:ieu-a-1112	ieu-a-294	ieu-a-1112	14890	rs4703855	-0.333748	0.534751	0.53255
61	Inflammatory bowel disease || id:ieu-a-294	Primary sclerosing cholangitis || id:ieu-a-1112	ieu-a-294	ieu-a-1112	14890	rs4743820	-0.38611	0.500373	0.440325
62	Inflammatory bowel disease || id:ieu-a-294	Primary sclerosing cholangitis || id:ieu-a-1112	ieu-a-294	ieu-a-1112	14890	rs4795397	-0.0575972	0.216852	0.790543
63	Inflammatory bowel disease || id:ieu-a-294	Primary sclerosing cholangitis || id:ieu-a-1112	ieu-a-294	ieu-a-1112	14890	rs4976646	-0.55035	0.493074	0.264353
64	Inflammatory bowel disease || id:ieu-a-294	Primary sclerosing cholangitis || id:ieu-a-1112	ieu-a-294	ieu-a-1112	14890	rs516246	1.78045	0.397036	7.31e-06
65	Inflammatory bowel disease || id:ieu-a-294	Primary sclerosing cholangitis || id:ieu-a-1112	ieu-a-294	ieu-a-1112	14890	rs55808324	0.188665	0.361157	0.601399
66	Inflammatory bowel disease || id:ieu-a-294	Primary sclerosing cholangitis || id:ieu-a-1112	ieu-a-294	ieu-a-1112	14890	rs559928	0.2098	0.423783	0.620554
67	Inflammatory bowel disease || id:ieu-a-294	Primary sclerosing cholangitis || id:ieu-a-1112	ieu-a-294	ieu-a-1112	14890	rs56167332	-0.108159	0.230984	0.639604
68	Inflammatory bowel disease || id:ieu-a-294	Primary sclerosing cholangitis || id:ieu-a-1112	ieu-a-294	ieu-a-1112	14890	rs6058869	0.513596	0.538972	0.340632
69	Inflammatory bowel disease || id:ieu-a-294	Primary sclerosing cholangitis || id:ieu-a-1112	ieu-a-294	ieu-a-1112	14890	rs6074022	-0.24024	0.457859	0.59979
70	Inflammatory bowel disease || id:ieu-a-294	Primary sclerosing cholangitis || id:ieu-a-1112	ieu-a-294	ieu-a-1112	14890	rs6111031	0.354008	0.174182	0.0421134
71	Inflammatory bowel disease || id:ieu-a-294	Primary sclerosing cholangitis || id:ieu-a-1112	ieu-a-294	ieu-a-1112	14890	rs62037363	0.522943	0.313908	0.0957314
72	Inflammatory bowel disease || id:ieu-a-294	Primary sclerosing cholangitis || id:ieu-a-1112	ieu-a-294	ieu-a-1112	14890	rs62434177	0.154184	0.608582	0.799997
73	Inflammatory bowel disease || id:ieu-a-294	Primary sclerosing cholangitis || id:ieu-a-1112	ieu-a-294	ieu-a-1112	14890	rs6456426	0.905633	0.528439	0.0865671
74	Inflammatory bowel disease || id:ieu-a-294	Primary sclerosing cholangitis || id:ieu-a-1112	ieu-a-294	ieu-a-1112	14890	rs648541	-0.335507	0.477941	0.482689
75	Inflammatory bowel disease || id:ieu-a-294	Primary sclerosing cholangitis || id:ieu-a-1112	ieu-a-294	ieu-a-1112	14890	rs6561151	-0.285875	0.36	0.427139
76	Inflammatory bowel disease || id:ieu-a-294	Primary sclerosing cholangitis || id:ieu-a-1112	ieu-a-294	ieu-a-1112	14890	rs6584281	0.785185	0.188291	3.05e-05
77	Inflammatory bowel disease || id:ieu-a-294	Primary sclerosing cholangitis || id:ieu-a-1112	ieu-a-294	ieu-a-1112	14890	rs6588248	-0.396006	0.353716	0.262902
78	Inflammatory bowel disease || id:ieu-a-294	Primary sclerosing cholangitis || id:ieu-a-1112	ieu-a-294	ieu-a-1112	14890	rs6651252	-0.22876	0.473316	0.628873
79	Inflammatory bowel disease || id:ieu-a-294	Primary sclerosing cholangitis || id:ieu-a-1112	ieu-a-294	ieu-a-1112	14890	rs6708373	0.306622	0.216131	0.155991
80	Inflammatory bowel disease || id:ieu-a-294	Primary sclerosing cholangitis || id:ieu-a-1112	ieu-a-294	ieu-a-1112	14890	rs6740462	1.41733	0.437721	0.00120383
81	Inflammatory bowel disease || id:ieu-a-294	Primary sclerosing cholangitis || id:ieu-a-1112	ieu-a-294	ieu-a-1112	14890	rs6745185	1.20786	0.572847	0.0349854
82	Inflammatory bowel disease || id:ieu-a-294	Primary sclerosing cholangitis || id:ieu-a-1112	ieu-a-294	ieu-a-1112	14890	rs67643815	1.78726	0.556357	0.00131618
83	Inflammatory bowel disease || id:ieu-a-294	Primary sclerosing cholangitis || id:ieu-a-1112	ieu-a-294	ieu-a-1112	14890	rs6933404	0.0520882	0.375972	0.889811
84	Inflammatory bowel disease || id:ieu-a-294	Primary sclerosing cholangitis || id:ieu-a-1112	ieu-a-294	ieu-a-1112	14890	rs7011507	-0.429449	0.520088	0.40896
85	Inflammatory bowel disease || id:ieu-a-294	Primary sclerosing cholangitis || id:ieu-a-1112	ieu-a-294	ieu-a-1112	14890	rs7015630	-0.594072	0.525646	0.258402
86	Inflammatory bowel disease || id:ieu-a-294	Primary sclerosing cholangitis || id:ieu-a-1112	ieu-a-294	ieu-a-1112	14890	rs71593329	0.282352	0.378307	0.455452
87	Inflammatory bowel disease || id:ieu-a-294	Primary sclerosing cholangitis || id:ieu-a-1112	ieu-a-294	ieu-a-1112	14890	rs7194886	0.0316762	0.269786	0.906533
88	Inflammatory bowel disease || id:ieu-a-294	Primary sclerosing cholangitis || id:ieu-a-1112	ieu-a-294	ieu-a-1112	14890	rs7240004	0.194166	0.526146	0.712102
89	Inflammatory bowel disease || id:ieu-a-294	Primary sclerosing cholangitis || id:ieu-a-1112	ieu-a-294	ieu-a-1112	14890	rs7253253	-0.327448	0.617449	0.595887
90	Inflammatory bowel disease || id:ieu-a-294	Primary sclerosing cholangitis || id:ieu-a-1112	ieu-a-294	ieu-a-1112	14890	rs72634258	-0.078425	0.315266	0.803548
91	Inflammatory bowel disease || id:ieu-a-294	Primary sclerosing cholangitis || id:ieu-a-1112	ieu-a-294	ieu-a-1112	14890	rs72924296	-0.0781266	0.61091	0.898239
92	Inflammatory bowel disease || id:ieu-a-294	Primary sclerosing cholangitis || id:ieu-a-1112	ieu-a-294	ieu-a-1112	14890	rs744166	-0.168542	0.309947	0.586595
93	Inflammatory bowel disease || id:ieu-a-294	Primary sclerosing cholangitis || id:ieu-a-1112	ieu-a-294	ieu-a-1112	14890	rs7523442	-0.166878	0.248922	0.502601
94	Inflammatory bowel disease || id:ieu-a-294	Primary sclerosing cholangitis || id:ieu-a-1112	ieu-a-294	ieu-a-1112	14890	rs7547569	0.214604	0.0973424	0.0274797
95	Inflammatory bowel disease || id:ieu-a-294	Primary sclerosing cholangitis || id:ieu-a-1112	ieu-a-294	ieu-a-1112	14890	rs7608910	1.05704	0.276802	0.000134133
96	Inflammatory bowel disease || id:ieu-a-294	Primary sclerosing cholangitis || id:ieu-a-1112	ieu-a-294	ieu-a-1112	14890	rs7657746	2.47669	0.414488	2.3e-09
97	Inflammatory bowel disease || id:ieu-a-294	Primary sclerosing cholangitis || id:ieu-a-1112	ieu-a-294	ieu-a-1112	14890	rs769177	0.41722	0.344956	0.226475
98	Inflammatory bowel disease || id:ieu-a-294	Primary sclerosing cholangitis || id:ieu-a-1112	ieu-a-294	ieu-a-1112	14890	rs7711427	0.550565	0.177382	0.0019103
99	Inflammatory bowel disease || id:ieu-a-294	Primary sclerosing cholangitis || id:ieu-a-1112	ieu-a-294	ieu-a-1112	14890	rs7773324	2.66374	0.582355	4.78e-06
100	Inflammatory bowel disease || id:ieu-a-294	Primary sclerosing cholangitis || id:ieu-a-1112	ieu-a-294	ieu-a-1112	14890	rs780094	-0.315337	0.383115	0.410459
101	Inflammatory bowel disease || id:ieu-a-294	Primary sclerosing cholangitis || id:ieu-a-1112	ieu-a-294	ieu-a-1112	14890	rs7848647	0.11246	0.24171	0.641739
102	Inflammatory bowel disease || id:ieu-a-294	Primary sclerosing cholangitis || id:ieu-a-1112	ieu-a-294	ieu-a-1112	14890	rs79980175	-0.758745	0.440639	0.0850838
103	Inflammatory bowel disease || id:ieu-a-294	Primary sclerosing cholangitis || id:ieu-a-1112	ieu-a-294	ieu-a-1112	14890	rs8127691	0.999667	0.262561	0.000140454
104	Inflammatory bowel disease || id:ieu-a-294	Primary sclerosing cholangitis || id:ieu-a-1112	ieu-a-294	ieu-a-1112	14890	rs913678	0.0721115	0.5205	0.889811
105	Inflammatory bowel disease || id:ieu-a-294	Primary sclerosing cholangitis || id:ieu-a-1112	ieu-a-294	ieu-a-1112	14890	rs9264942	-3.14578	0.337938	1.29e-20
106	Inflammatory bowel disease || id:ieu-a-294	Primary sclerosing cholangitis || id:ieu-a-1112	ieu-a-294	ieu-a-1112	14890	rs9273363	-2.13386	0.186404	2.42e-30
107	Inflammatory bowel disease || id:ieu-a-294	Primary sclerosing cholangitis || id:ieu-a-1112	ieu-a-294	ieu-a-1112	14890	rs941823	-0.036083	0.445691	0.935474
108	Inflammatory bowel disease || id:ieu-a-294	Primary sclerosing cholangitis || id:ieu-a-1112	ieu-a-294	ieu-a-1112	14890	rs9457247	-0.0336004	0.336508	0.920463
109	Inflammatory bowel disease || id:ieu-a-294	Primary sclerosing cholangitis || id:ieu-a-1112	ieu-a-294	ieu-a-1112	14890	rs9557207	1.39129	0.443965	0.00172561
110	Inflammatory bowel disease || id:ieu-a-294	Primary sclerosing cholangitis || id:ieu-a-1112	ieu-a-294	ieu-a-1112	14890	rs974801	0.955399	0.425989	0.0249112
111	Inflammatory bowel disease || id:ieu-a-294	Primary sclerosing cholangitis || id:ieu-a-1112	ieu-a-294	ieu-a-1112	14890	rs9836291	1.74935	0.192706	1.11e-19
112	Inflammatory bowel disease || id:ieu-a-294	Primary sclerosing cholangitis || id:ieu-a-1112	ieu-a-294	ieu-a-1112	14890	rs9889296	0.29999	0.323813	0.354221
	Inflammatory bowel disease || id:ieu-a-294	Primary sclerosing cholangitis || id:ieu-a-1112	ieu-a-294	ieu-a-1112	14890	All - MR Egger	0.144925	0.174298	0.407503
	Inflammatory bowel disease || id:ieu-a-294	Primary sclerosing cholangitis || id:ieu-a-1112	ieu-a-294	ieu-a-1112	14890	All - Inverse variance weighted	0.256963	0.0749902	0.00061113
	Inflammatory bowel disease || id:ieu-a-294	Primary sclerosing cholangitis || id:ieu-a-1112	ieu-a-294	ieu-a-1112	14890	All - Maximum likelihood	0.271097	0.0323052	4.79e-17
	Inflammatory bowel disease || id:ieu-a-294	Primary sclerosing cholangitis || id:ieu-a-1112	ieu-a-294	ieu-a-1112	14890	All - Weighted median	0.21512	0.0594525	0.000296494
	Inflammatory bowel disease || id:ieu-a-294	Primary sclerosing cholangitis || id:ieu-a-1112	ieu-a-294	ieu-a-1112	14890	All - Robust adjusted profile score (RAPS)	0.258443	0.0541163	1.79e-06

## Sheet: Table S2
Table S2. Characteristics of single SNPs used in the Mendelian randomization analysis of the effects of UC on PSC.
	exposure	outcome	id.exposure	id.outcome	samplesize	SNP	b	se	p
1	Ulcerative colitis || id:ieu-a-970	Primary sclerosing cholangitis || id:ieu-a-1112	ieu-a-970	ieu-a-1112	14890	rs10185424	0.465566	0.331265	0.159897
2	Ulcerative colitis || id:ieu-a-970	Primary sclerosing cholangitis || id:ieu-a-1112	ieu-a-970	ieu-a-1112	14890	rs10460566	0.479662	0.415814	0.248685
3	Ulcerative colitis || id:ieu-a-970	Primary sclerosing cholangitis || id:ieu-a-1112	ieu-a-970	ieu-a-1112	14890	rs10748783	0.779292	0.188157	3.44727e-05
4	Ulcerative colitis || id:ieu-a-970	Primary sclerosing cholangitis || id:ieu-a-1112	ieu-a-970	ieu-a-1112	14890	rs10758669	0.400265	0.251365	0.111303
5	Ulcerative colitis || id:ieu-a-970	Primary sclerosing cholangitis || id:ieu-a-1112	ieu-a-970	ieu-a-1112	14890	rs1077773	0.676437	0.499111	0.175327
6	Ulcerative colitis || id:ieu-a-970	Primary sclerosing cholangitis || id:ieu-a-1112	ieu-a-970	ieu-a-1112	14890	rs10910092	1.66878	0.359002	3.34541e-06
7	Ulcerative colitis || id:ieu-a-970	Primary sclerosing cholangitis || id:ieu-a-1112	ieu-a-970	ieu-a-1112	14890	rs11083840	1.35235	0.44842	0.00256289
8	Ulcerative colitis || id:ieu-a-970	Primary sclerosing cholangitis || id:ieu-a-1112	ieu-a-970	ieu-a-1112	14890	rs11150589	0.539241	0.425787	0.20535
9	Ulcerative colitis || id:ieu-a-970	Primary sclerosing cholangitis || id:ieu-a-1112	ieu-a-970	ieu-a-1112	14890	rs111830527	0.767237	0.35877	0.0324744
10	Ulcerative colitis || id:ieu-a-970	Primary sclerosing cholangitis || id:ieu-a-1112	ieu-a-970	ieu-a-1112	14890	rs11229555	-0.522979	0.412947	0.20535
11	Ulcerative colitis || id:ieu-a-970	Primary sclerosing cholangitis || id:ieu-a-1112	ieu-a-970	ieu-a-1112	14890	rs11230563	0.406695	0.426288	0.340065
12	Ulcerative colitis || id:ieu-a-970	Primary sclerosing cholangitis || id:ieu-a-1112	ieu-a-970	ieu-a-1112	14890	rs11641184	1.02194	0.384501	0.00786448
13	Ulcerative colitis || id:ieu-a-970	Primary sclerosing cholangitis || id:ieu-a-1112	ieu-a-970	ieu-a-1112	14890	rs11676348	0.946562	0.389595	0.0151154
14	Ulcerative colitis || id:ieu-a-970	Primary sclerosing cholangitis || id:ieu-a-1112	ieu-a-970	ieu-a-1112	14890	rs1182188	-0.0463461	0.306649	0.879867
15	Ulcerative colitis || id:ieu-a-970	Primary sclerosing cholangitis || id:ieu-a-1112	ieu-a-970	ieu-a-1112	14890	rs12103	-0.556804	0.451994	0.217993
16	Ulcerative colitis || id:ieu-a-970	Primary sclerosing cholangitis || id:ieu-a-1112	ieu-a-970	ieu-a-1112	14890	rs12318183	0.241837	0.191148	0.205805
17	Ulcerative colitis || id:ieu-a-970	Primary sclerosing cholangitis || id:ieu-a-1112	ieu-a-970	ieu-a-1112	14890	rs12718244	0.0139252	0.431898	0.974279
18	Ulcerative colitis || id:ieu-a-970	Primary sclerosing cholangitis || id:ieu-a-1112	ieu-a-970	ieu-a-1112	14890	rs12720356	-0.9683	0.424063	0.0224077
19	Ulcerative colitis || id:ieu-a-970	Primary sclerosing cholangitis || id:ieu-a-1112	ieu-a-970	ieu-a-1112	14890	rs1297256	0.234677	0.306748	0.444243
20	Ulcerative colitis || id:ieu-a-970	Primary sclerosing cholangitis || id:ieu-a-1112	ieu-a-970	ieu-a-1112	14890	rs13136827	2.33267	0.393511	3.06944e-09
21	Ulcerative colitis || id:ieu-a-970	Primary sclerosing cholangitis || id:ieu-a-1112	ieu-a-970	ieu-a-1112	14890	rs13255292	1.35904	0.503558	0.00695757
22	Ulcerative colitis || id:ieu-a-970	Primary sclerosing cholangitis || id:ieu-a-1112	ieu-a-970	ieu-a-1112	14890	rs13430791	0.02829	0.424985	0.946927
23	Ulcerative colitis || id:ieu-a-970	Primary sclerosing cholangitis || id:ieu-a-1112	ieu-a-970	ieu-a-1112	14890	rs16841904	-0.366168	0.418495	0.381594
24	Ulcerative colitis || id:ieu-a-970	Primary sclerosing cholangitis || id:ieu-a-1112	ieu-a-970	ieu-a-1112	14890	rs17780256	0.239323	0.346653	0.489955
25	Ulcerative colitis || id:ieu-a-970	Primary sclerosing cholangitis || id:ieu-a-1112	ieu-a-970	ieu-a-1112	14890	rs1801274	0.335439	0.204803	0.101451
26	Ulcerative colitis || id:ieu-a-970	Primary sclerosing cholangitis || id:ieu-a-1112	ieu-a-970	ieu-a-1112	14890	rs1990760	0.931775	0.397321	0.0190196
27	Ulcerative colitis || id:ieu-a-970	Primary sclerosing cholangitis || id:ieu-a-1112	ieu-a-970	ieu-a-1112	14890	rs2274351	0.578665	0.407888	0.155991
28	Ulcerative colitis || id:ieu-a-970	Primary sclerosing cholangitis || id:ieu-a-1112	ieu-a-970	ieu-a-1112	14890	rs2395022	0.35265	0.451342	0.434604
29	Ulcerative colitis || id:ieu-a-970	Primary sclerosing cholangitis || id:ieu-a-1112	ieu-a-970	ieu-a-1112	14890	rs2497318	1.29595	0.405949	0.00141103
30	Ulcerative colitis || id:ieu-a-970	Primary sclerosing cholangitis || id:ieu-a-1112	ieu-a-970	ieu-a-1112	14890	rs2516440	4.16354	0.390881	1.71271e-26
31	Ulcerative colitis || id:ieu-a-970	Primary sclerosing cholangitis || id:ieu-a-1112	ieu-a-970	ieu-a-1112	14890	rs272882	-0.0614287	0.219394	0.779484
32	Ulcerative colitis || id:ieu-a-970	Primary sclerosing cholangitis || id:ieu-a-1112	ieu-a-970	ieu-a-1112	14890	rs2836883	1.32778	0.18051	1.89884e-13
33	Ulcerative colitis || id:ieu-a-970	Primary sclerosing cholangitis || id:ieu-a-1112	ieu-a-970	ieu-a-1112	14890	rs3024493	0.0657978	0.207709	0.751412
34	Ulcerative colitis || id:ieu-a-970	Primary sclerosing cholangitis || id:ieu-a-1112	ieu-a-970	ieu-a-1112	14890	rs34659678	0.33116	0.314365	0.292146
35	Ulcerative colitis || id:ieu-a-970	Primary sclerosing cholangitis || id:ieu-a-1112	ieu-a-970	ieu-a-1112	14890	rs35223180	-0.459926	0.319142	0.149547
36	Ulcerative colitis || id:ieu-a-970	Primary sclerosing cholangitis || id:ieu-a-1112	ieu-a-970	ieu-a-1112	14890	rs36070529	0.301134	0.403472	0.455452
37	Ulcerative colitis || id:ieu-a-970	Primary sclerosing cholangitis || id:ieu-a-1112	ieu-a-970	ieu-a-1112	14890	rs3774937	1.22217	0.302188	5.24573e-05
38	Ulcerative colitis || id:ieu-a-970	Primary sclerosing cholangitis || id:ieu-a-1112	ieu-a-970	ieu-a-1112	14890	rs3776414	-0.267052	0.454031	0.556411
39	Ulcerative colitis || id:ieu-a-970	Primary sclerosing cholangitis || id:ieu-a-1112	ieu-a-970	ieu-a-1112	14890	rs4366152	0.0661968	0.265845	0.803357
40	Ulcerative colitis || id:ieu-a-970	Primary sclerosing cholangitis || id:ieu-a-1112	ieu-a-970	ieu-a-1112	14890	rs4656958	0.684096	0.400409	0.0875447
41	Ulcerative colitis || id:ieu-a-970	Primary sclerosing cholangitis || id:ieu-a-1112	ieu-a-970	ieu-a-1112	14890	rs4676410	1.06929	0.30277	0.000412937
42	Ulcerative colitis || id:ieu-a-970	Primary sclerosing cholangitis || id:ieu-a-1112	ieu-a-970	ieu-a-1112	14890	rs4712520	-0.677227	0.40865	0.0974727
43	Ulcerative colitis || id:ieu-a-970	Primary sclerosing cholangitis || id:ieu-a-1112	ieu-a-970	ieu-a-1112	14890	rs4728142	1.23299	0.350634	0.000437374
44	Ulcerative colitis || id:ieu-a-970	Primary sclerosing cholangitis || id:ieu-a-1112	ieu-a-970	ieu-a-1112	14890	rs4743820	-0.305138	0.395439	0.440325
45	Ulcerative colitis || id:ieu-a-970	Primary sclerosing cholangitis || id:ieu-a-1112	ieu-a-970	ieu-a-1112	14890	rs4747886	1.31523	0.473947	0.00551935
46	Ulcerative colitis || id:ieu-a-970	Primary sclerosing cholangitis || id:ieu-a-1112	ieu-a-970	ieu-a-1112	14890	rs4795397	-0.0569753	0.214511	0.790543
47	Ulcerative colitis || id:ieu-a-970	Primary sclerosing cholangitis || id:ieu-a-1112	ieu-a-970	ieu-a-1112	14890	rs483905	0.506626	0.400034	0.20535
48	Ulcerative colitis || id:ieu-a-970	Primary sclerosing cholangitis || id:ieu-a-1112	ieu-a-970	ieu-a-1112	14890	rs4947328	0.802957	0.371677	0.0307448
49	Ulcerative colitis || id:ieu-a-970	Primary sclerosing cholangitis || id:ieu-a-1112	ieu-a-970	ieu-a-1112	14890	rs4973341	1.23521	0.449145	0.0059571
50	Ulcerative colitis || id:ieu-a-970	Primary sclerosing cholangitis || id:ieu-a-1112	ieu-a-970	ieu-a-1112	14890	rs4976646	-0.510084	0.456999	0.264353
51	Ulcerative colitis || id:ieu-a-970	Primary sclerosing cholangitis || id:ieu-a-1112	ieu-a-970	ieu-a-1112	14890	rs55808324	0.209434	0.400915	0.601399
52	Ulcerative colitis || id:ieu-a-970	Primary sclerosing cholangitis || id:ieu-a-1112	ieu-a-970	ieu-a-1112	14890	rs56167332	-0.119243	0.254655	0.639604
53	Ulcerative colitis || id:ieu-a-970	Primary sclerosing cholangitis || id:ieu-a-1112	ieu-a-970	ieu-a-1112	14890	rs59418206	0.84343	0.421475	0.0453771
54	Ulcerative colitis || id:ieu-a-970	Primary sclerosing cholangitis || id:ieu-a-1112	ieu-a-970	ieu-a-1112	14890	rs6111031	0.358389	0.176338	0.0421134
55	Ulcerative colitis || id:ieu-a-970	Primary sclerosing cholangitis || id:ieu-a-1112	ieu-a-970	ieu-a-1112	14890	rs61893460	0.147292	0.24769	0.552069
56	Ulcerative colitis || id:ieu-a-970	Primary sclerosing cholangitis || id:ieu-a-1112	ieu-a-970	ieu-a-1112	14890	rs6426833	-0.0894306	0.133398	0.502601
57	Ulcerative colitis || id:ieu-a-970	Primary sclerosing cholangitis || id:ieu-a-1112	ieu-a-970	ieu-a-1112	14890	rs661054	-0.182123	0.248282	0.463234
58	Ulcerative colitis || id:ieu-a-970	Primary sclerosing cholangitis || id:ieu-a-1112	ieu-a-970	ieu-a-1112	14890	rs6920220	0.0135978	0.245005	0.95574
59	Ulcerative colitis || id:ieu-a-970	Primary sclerosing cholangitis || id:ieu-a-1112	ieu-a-970	ieu-a-1112	14890	rs7240004	0.156816	0.424935	0.712102
60	Ulcerative colitis || id:ieu-a-970	Primary sclerosing cholangitis || id:ieu-a-1112	ieu-a-970	ieu-a-1112	14890	rs7404095	0.8119	0.431944	0.0601569
61	Ulcerative colitis || id:ieu-a-970	Primary sclerosing cholangitis || id:ieu-a-1112	ieu-a-970	ieu-a-1112	14890	rs7547569	0.280193	0.127093	0.0274797
62	Ulcerative colitis || id:ieu-a-970	Primary sclerosing cholangitis || id:ieu-a-1112	ieu-a-970	ieu-a-1112	14890	rs7608910	1.05159	0.275376	0.000134133
63	Ulcerative colitis || id:ieu-a-970	Primary sclerosing cholangitis || id:ieu-a-1112	ieu-a-970	ieu-a-1112	14890	rs76546301	0.27295	0.422705	0.51846
64	Ulcerative colitis || id:ieu-a-970	Primary sclerosing cholangitis || id:ieu-a-1112	ieu-a-970	ieu-a-1112	14890	rs76904798	0.132884	0.43967	0.762471
65	Ulcerative colitis || id:ieu-a-970	Primary sclerosing cholangitis || id:ieu-a-1112	ieu-a-970	ieu-a-1112	14890	rs7711427	1.08186	0.348557	0.0019103
66	Ulcerative colitis || id:ieu-a-970	Primary sclerosing cholangitis || id:ieu-a-1112	ieu-a-970	ieu-a-1112	14890	rs7738430	0.273804	0.241871	0.257625
67	Ulcerative colitis || id:ieu-a-970	Primary sclerosing cholangitis || id:ieu-a-1112	ieu-a-970	ieu-a-1112	14890	rs913678	0.0658352	0.475198	0.889811
68	Ulcerative colitis || id:ieu-a-970	Primary sclerosing cholangitis || id:ieu-a-1112	ieu-a-970	ieu-a-1112	14890	rs9271255	-0.315276	0.136862	0.0212447
69	Ulcerative colitis || id:ieu-a-970	Primary sclerosing cholangitis || id:ieu-a-1112	ieu-a-970	ieu-a-1112	14890	rs941823	-0.0275655	0.340483	0.935474
70	Ulcerative colitis || id:ieu-a-970	Primary sclerosing cholangitis || id:ieu-a-1112	ieu-a-970	ieu-a-1112	14890	rs9611131	0.558775	0.350395	0.110779
71	Ulcerative colitis || id:ieu-a-970	Primary sclerosing cholangitis || id:ieu-a-1112	ieu-a-970	ieu-a-1112	14890	rs9836291	1.65287	0.182078	1.10785e-19
72	Ulcerative colitis || id:ieu-a-970	Primary sclerosing cholangitis || id:ieu-a-1112	ieu-a-970	ieu-a-1112	14890	rs9891119	-0.188249	0.346188	0.586595
73	Ulcerative colitis || id:ieu-a-970	Primary sclerosing cholangitis || id:ieu-a-1112	ieu-a-970	ieu-a-1112	14890	rs9941524	0.361939	0.29678	0.222634
	Ulcerative colitis || id:ieu-a-970	Primary sclerosing cholangitis || id:ieu-a-1112	ieu-a-970	ieu-a-1112	14890	All - MR Egger	0.123234	0.179942	0.495667
	Ulcerative colitis || id:ieu-a-970	Primary sclerosing cholangitis || id:ieu-a-1112	ieu-a-970	ieu-a-1112	14890	All - Inverse variance weighted	0.391744	0.0782566	5.56033e-07
	Ulcerative colitis || id:ieu-a-970	Primary sclerosing cholangitis || id:ieu-a-1112	ieu-a-970	ieu-a-1112	14890	All - Maximum likelihood	0.417838	0.0351449	1.34982e-32
	Ulcerative colitis || id:ieu-a-970	Primary sclerosing cholangitis || id:ieu-a-1112	ieu-a-970	ieu-a-1112	14890	All - Weighted median	0.273259	0.0612698	8.19871e-06
	Ulcerative colitis || id:ieu-a-970	Primary sclerosing cholangitis || id:ieu-a-1112	ieu-a-970	ieu-a-1112	14890	All - Robust adjusted profile score (RAPS)	0.33326	0.0643603	2.24236e-07

## Sheet: Table S3
Table S3. Characteristics of single SNPs used in the Mendelian randomization analysis of the effects of CD on PSC.
	exposure	outcome	samplesize	SNP	b	se	p
1	Crohn's disease || id:ieu-a-12	Primary sclerosing cholangitis || id:ieu-a-1112	14890	rs10758669	0.382805	0.240401	0.111303
2	Crohn's disease || id:ieu-a-12	Primary sclerosing cholangitis || id:ieu-a-1112	14890	rs10798069	0.392334	0.440422	0.37303
3	Crohn's disease || id:ieu-a-12	Primary sclerosing cholangitis || id:ieu-a-1112	14890	rs10800309	0.465677	0.398192	0.242211
4	Crohn's disease || id:ieu-a-12	Primary sclerosing cholangitis || id:ieu-a-1112	14890	rs11117431	0.326859	0.288069	0.25652
5	Crohn's disease || id:ieu-a-12	Primary sclerosing cholangitis || id:ieu-a-1112	14890	rs11152949	-0.0298248	0.276431	0.914081
6	Crohn's disease || id:ieu-a-12	Primary sclerosing cholangitis || id:ieu-a-1112	14890	rs11159833	0.22162	0.341435	0.516285
7	Crohn's disease || id:ieu-a-12	Primary sclerosing cholangitis || id:ieu-a-1112	14890	rs11691685	0.0693773	0.342451	0.839455
8	Crohn's disease || id:ieu-a-12	Primary sclerosing cholangitis || id:ieu-a-1112	14890	rs11713774	0.02258	0.33167	0.945722
9	Crohn's disease || id:ieu-a-12	Primary sclerosing cholangitis || id:ieu-a-1112	14890	rs11793497	0.444628	0.213116	0.0369497
10	Crohn's disease || id:ieu-a-12	Primary sclerosing cholangitis || id:ieu-a-1112	14890	rs12411259	-0.074055	0.260486	0.776184
11	Crohn's disease || id:ieu-a-12	Primary sclerosing cholangitis || id:ieu-a-1112	14890	rs1250573	-0.0981199	0.261128	0.7071
12	Crohn's disease || id:ieu-a-12	Primary sclerosing cholangitis || id:ieu-a-1112	14890	rs1267501	-0.294426	0.447357	0.510444
13	Crohn's disease || id:ieu-a-12	Primary sclerosing cholangitis || id:ieu-a-1112	14890	rs12694846	0.264629	0.338055	0.433745
14	Crohn's disease || id:ieu-a-12	Primary sclerosing cholangitis || id:ieu-a-1112	14890	rs1292053	0.163278	0.339967	0.63103
15	Crohn's disease || id:ieu-a-12	Primary sclerosing cholangitis || id:ieu-a-1112	14890	rs12949918	-0.133455	0.29757	0.653806
16	Crohn's disease || id:ieu-a-12	Primary sclerosing cholangitis || id:ieu-a-1112	14890	rs1297258	0.194054	0.251481	0.440325
17	Crohn's disease || id:ieu-a-12	Primary sclerosing cholangitis || id:ieu-a-1112	14890	rs13001325	0.240929	0.252676	0.340332
18	Crohn's disease || id:ieu-a-12	Primary sclerosing cholangitis || id:ieu-a-1112	14890	rs13407913	-0.0261598	0.26199	0.920463
19	Crohn's disease || id:ieu-a-12	Primary sclerosing cholangitis || id:ieu-a-1112	14890	rs1363907	-0.316522	0.292469	0.279146
20	Crohn's disease || id:ieu-a-12	Primary sclerosing cholangitis || id:ieu-a-1112	14890	rs1456896	-0.162456	0.327506	0.619866
21	Crohn's disease || id:ieu-a-12	Primary sclerosing cholangitis || id:ieu-a-1112	14890	rs1517352	0.345148	0.399952	0.388151
22	Crohn's disease || id:ieu-a-12	Primary sclerosing cholangitis || id:ieu-a-1112	14890	rs1569328	0.359115	0.430344	0.404009
23	Crohn's disease || id:ieu-a-12	Primary sclerosing cholangitis || id:ieu-a-1112	14890	rs1646019	0.912686	0.296286	0.00206706
24	Crohn's disease || id:ieu-a-12	Primary sclerosing cholangitis || id:ieu-a-1112	14890	rs17129991	-0.370037	0.355057	0.297324
25	Crohn's disease || id:ieu-a-12	Primary sclerosing cholangitis || id:ieu-a-1112	14890	rs17293632	0.237796	0.319354	0.456505
26	Crohn's disease || id:ieu-a-12	Primary sclerosing cholangitis || id:ieu-a-1112	14890	rs17622378	-0.160514	0.157731	0.308849
27	Crohn's disease || id:ieu-a-12	Primary sclerosing cholangitis || id:ieu-a-1112	14890	rs181826	0.198832	0.311261	0.522957
28	Crohn's disease || id:ieu-a-12	Primary sclerosing cholangitis || id:ieu-a-1112	14890	rs1847472	-1.32726	0.374771	0.000397812
29	Crohn's disease || id:ieu-a-12	Primary sclerosing cholangitis || id:ieu-a-1112	14890	rs2024092	-0.489765	0.297974	0.100248
30	Crohn's disease || id:ieu-a-12	Primary sclerosing cholangitis || id:ieu-a-1112	14890	rs212388	-0.624294	0.332106	0.0601349
31	Crohn's disease || id:ieu-a-12	Primary sclerosing cholangitis || id:ieu-a-1112	14890	rs2153283	0.127779	0.340061	0.7071
32	Crohn's disease || id:ieu-a-12	Primary sclerosing cholangitis || id:ieu-a-1112	14890	rs2227551	-0.59542	0.392174	0.12895
33	Crohn's disease || id:ieu-a-12	Primary sclerosing cholangitis || id:ieu-a-1112	14890	rs2270395	0.559215	0.329773	0.0899316
34	Crohn's disease || id:ieu-a-12	Primary sclerosing cholangitis || id:ieu-a-1112	14890	rs2395022	0.366075	0.468524	0.434604
35	Crohn's disease || id:ieu-a-12	Primary sclerosing cholangitis || id:ieu-a-1112	14890	rs2413583	0.200094	0.19486	0.304487
36	Crohn's disease || id:ieu-a-12	Primary sclerosing cholangitis || id:ieu-a-1112	14890	rs2538470	0.172298	0.466889	0.712102
37	Crohn's disease || id:ieu-a-12	Primary sclerosing cholangitis || id:ieu-a-1112	14890	rs259964	1.19522	0.47663	0.012154
38	Crohn's disease || id:ieu-a-12	Primary sclerosing cholangitis || id:ieu-a-1112	14890	rs2641348	-0.163205	0.412079	0.692067
39	Crohn's disease || id:ieu-a-12	Primary sclerosing cholangitis || id:ieu-a-1112	14890	rs26528	0.478327	0.292044	0.101451
40	Crohn's disease || id:ieu-a-12	Primary sclerosing cholangitis || id:ieu-a-1112	14890	rs2974935	-0.210101	0.463265	0.650172
41	Crohn's disease || id:ieu-a-12	Primary sclerosing cholangitis || id:ieu-a-1112	14890	rs3024505	0.0960208	0.284313	0.735567
42	Crohn's disease || id:ieu-a-12	Primary sclerosing cholangitis || id:ieu-a-1112	14890	rs303429	0.551962	0.406421	0.174431
43	Crohn's disease || id:ieu-a-12	Primary sclerosing cholangitis || id:ieu-a-1112	14890	rs3129871	-2.11152	0.352585	2.12e-09
44	Crohn's disease || id:ieu-a-12	Primary sclerosing cholangitis || id:ieu-a-1112	14890	rs3184504	2.7565	0.443452	5.1e-10
45	Crohn's disease || id:ieu-a-12	Primary sclerosing cholangitis || id:ieu-a-1112	14890	rs3197999	1.68151	0.232087	4.32e-13
46	Crohn's disease || id:ieu-a-12	Primary sclerosing cholangitis || id:ieu-a-1112	14890	rs34779708	0.461377	0.230557	0.0453771
47	Crohn's disease || id:ieu-a-12	Primary sclerosing cholangitis || id:ieu-a-1112	14890	rs34787213	-0.21037	0.287184	0.463846
48	Crohn's disease || id:ieu-a-12	Primary sclerosing cholangitis || id:ieu-a-1112	14890	rs34804116	0.819531	0.372703	0.027886
49	Crohn's disease || id:ieu-a-12	Primary sclerosing cholangitis || id:ieu-a-1112	14890	rs35164067	0.419562	0.306892	0.171583
50	Crohn's disease || id:ieu-a-12	Primary sclerosing cholangitis || id:ieu-a-1112	14890	rs35320439	0.305366	0.428288	0.475851
51	Crohn's disease || id:ieu-a-12	Primary sclerosing cholangitis || id:ieu-a-1112	14890	rs36016881	0.054901	0.367104	0.881118
52	Crohn's disease || id:ieu-a-12	Primary sclerosing cholangitis || id:ieu-a-1112	14890	rs3776414	-0.211873	0.360217	0.556411
53	Crohn's disease || id:ieu-a-12	Primary sclerosing cholangitis || id:ieu-a-1112	14890	rs3801810	0.0379907	0.333083	0.909192
54	Crohn's disease || id:ieu-a-12	Primary sclerosing cholangitis || id:ieu-a-1112	14890	rs438475	-2.7184	0.314315	5.21e-18
55	Crohn's disease || id:ieu-a-12	Primary sclerosing cholangitis || id:ieu-a-1112	14890	rs4703855	-0.323726	0.518693	0.53255
56	Crohn's disease || id:ieu-a-12	Primary sclerosing cholangitis || id:ieu-a-1112	14890	rs4795397	-0.0602107	0.226692	0.790543
57	Crohn's disease || id:ieu-a-12	Primary sclerosing cholangitis || id:ieu-a-1112	14890	rs516246	1.17416	0.261835	7.31e-06
58	Crohn's disease || id:ieu-a-12	Primary sclerosing cholangitis || id:ieu-a-1112	14890	rs559928	0.199776	0.403535	0.620554
59	Crohn's disease || id:ieu-a-12	Primary sclerosing cholangitis || id:ieu-a-1112	14890	rs56163845	0.437196	0.369935	0.237278
60	Crohn's disease || id:ieu-a-12	Primary sclerosing cholangitis || id:ieu-a-1112	14890	rs6074022	-0.185213	0.352986	0.59979
61	Crohn's disease || id:ieu-a-12	Primary sclerosing cholangitis || id:ieu-a-1112	14890	rs6111031	0.331096	0.162909	0.0421134
62	Crohn's disease || id:ieu-a-12	Primary sclerosing cholangitis || id:ieu-a-1112	14890	rs61839660	-1.45189	0.364473	6.79e-05
63	Crohn's disease || id:ieu-a-12	Primary sclerosing cholangitis || id:ieu-a-1112	14890	rs640466	0.0263556	0.408921	0.948611
64	Crohn's disease || id:ieu-a-12	Primary sclerosing cholangitis || id:ieu-a-1112	14890	rs6456426	0.58751	0.342813	0.0865671
65	Crohn's disease || id:ieu-a-12	Primary sclerosing cholangitis || id:ieu-a-1112	14890	rs6561151	-0.194277	0.244652	0.427139
66	Crohn's disease || id:ieu-a-12	Primary sclerosing cholangitis || id:ieu-a-1112	14890	rs6651252	-0.139453	0.288534	0.628873
67	Crohn's disease || id:ieu-a-12	Primary sclerosing cholangitis || id:ieu-a-1112	14890	rs6679677	-0.13863	0.507691	0.784807
68	Crohn's disease || id:ieu-a-12	Primary sclerosing cholangitis || id:ieu-a-1112	14890	rs6702421	-0.285848	0.317622	0.36814
69	Crohn's disease || id:ieu-a-12	Primary sclerosing cholangitis || id:ieu-a-1112	14890	rs6738394	1.354	0.373035	0.000283762
70	Crohn's disease || id:ieu-a-12	Primary sclerosing cholangitis || id:ieu-a-1112	14890	rs6738490	0.186153	0.128226	0.146567
71	Crohn's disease || id:ieu-a-12	Primary sclerosing cholangitis || id:ieu-a-1112	14890	rs6740462	1.13628	0.350923	0.00120383
72	Crohn's disease || id:ieu-a-12	Primary sclerosing cholangitis || id:ieu-a-1112	14890	rs6827756	0.974628	0.392581	0.0130423
73	Crohn's disease || id:ieu-a-12	Primary sclerosing cholangitis || id:ieu-a-1112	14890	rs6908425	-0.432486	0.35581	0.224176
74	Crohn's disease || id:ieu-a-12	Primary sclerosing cholangitis || id:ieu-a-1112	14890	rs7015630	-0.442681	0.391692	0.258402
75	Crohn's disease || id:ieu-a-12	Primary sclerosing cholangitis || id:ieu-a-1112	14890	rs7085798	0.731371	0.177805	3.9e-05
76	Crohn's disease || id:ieu-a-12	Primary sclerosing cholangitis || id:ieu-a-1112	14890	rs7194886	0.0175871	0.149789	0.906533
77	Crohn's disease || id:ieu-a-12	Primary sclerosing cholangitis || id:ieu-a-1112	14890	rs7236492	-1.12817	0.471598	0.0167462
78	Crohn's disease || id:ieu-a-12	Primary sclerosing cholangitis || id:ieu-a-1112	14890	rs72727394	0.11555	0.377786	0.75971
79	Crohn's disease || id:ieu-a-12	Primary sclerosing cholangitis || id:ieu-a-1112	14890	rs727563	0.622252	0.423337	0.141596
80	Crohn's disease || id:ieu-a-12	Primary sclerosing cholangitis || id:ieu-a-1112	14890	rs7438704	-0.212628	0.35756	0.552069
81	Crohn's disease || id:ieu-a-12	Primary sclerosing cholangitis || id:ieu-a-1112	14890	rs7517847	0.111061	0.101247	0.27267
82	Crohn's disease || id:ieu-a-12	Primary sclerosing cholangitis || id:ieu-a-1112	14890	rs7608910	1.10818	0.290194	0.000134133
83	Crohn's disease || id:ieu-a-12	Primary sclerosing cholangitis || id:ieu-a-1112	14890	rs76906269	0.0823328	0.273875	0.763703
84	Crohn's disease || id:ieu-a-12	Primary sclerosing cholangitis || id:ieu-a-1112	14890	rs7711427	0.387933	0.124985	0.0019103
85	Crohn's disease || id:ieu-a-12	Primary sclerosing cholangitis || id:ieu-a-1112	14890	rs7773324	2.09117	0.457178	4.78e-06
86	Crohn's disease || id:ieu-a-12	Primary sclerosing cholangitis || id:ieu-a-1112	14890	rs7786444	0.167924	0.428246	0.694969
87	Crohn's disease || id:ieu-a-12	Primary sclerosing cholangitis || id:ieu-a-1112	14890	rs77981966	0.124494	0.312062	0.689938
88	Crohn's disease || id:ieu-a-12	Primary sclerosing cholangitis || id:ieu-a-1112	14890	rs780094	-0.211985	0.257548	0.410459
89	Crohn's disease || id:ieu-a-12	Primary sclerosing cholangitis || id:ieu-a-1112	14890	rs7848647	0.105363	0.226456	0.641739
90	Crohn's disease || id:ieu-a-12	Primary sclerosing cholangitis || id:ieu-a-1112	14890	rs7969592	-0.350701	0.409893	0.392225
91	Crohn's disease || id:ieu-a-12	Primary sclerosing cholangitis || id:ieu-a-1112	14890	rs79980175	-0.53867	0.312831	0.0850838
92	Crohn's disease || id:ieu-a-12	Primary sclerosing cholangitis || id:ieu-a-1112	14890	rs8127691	0.925939	0.243197	0.000140454
93	Crohn's disease || id:ieu-a-12	Primary sclerosing cholangitis || id:ieu-a-1112	14890	rs915286	-0.0299797	0.450146	0.9469
94	Crohn's disease || id:ieu-a-12	Primary sclerosing cholangitis || id:ieu-a-1112	14890	rs9264942	-1.97541	0.21221	1.29e-20
95	Crohn's disease || id:ieu-a-12	Primary sclerosing cholangitis || id:ieu-a-1112	14890	rs9457247	-0.0242232	0.242595	0.920463
96	Crohn's disease || id:ieu-a-12	Primary sclerosing cholangitis || id:ieu-a-1112	14890	rs9491892	-0.571638	0.35541	0.107749
97	Crohn's disease || id:ieu-a-12	Primary sclerosing cholangitis || id:ieu-a-1112	14890	rs9554587	1.37698	0.409853	0.000780293
98	Crohn's disease || id:ieu-a-12	Primary sclerosing cholangitis || id:ieu-a-1112	14890	rs9594766	-0.650364	0.40786	0.110807
99	Crohn's disease || id:ieu-a-12	Primary sclerosing cholangitis || id:ieu-a-1112	14890	rs9889296	0.220121	0.237601	0.354221
	Crohn's disease || id:ieu-a-12	Primary sclerosing cholangitis || id:ieu-a-1112	14890	All - MR Egger	0.0599386	0.177018	0.735642
	Crohn's disease || id:ieu-a-12	Primary sclerosing cholangitis || id:ieu-a-1112	14890	All - Inverse variance weighted	0.118897	0.0652496	0.0684267
	Crohn's disease || id:ieu-a-12	Primary sclerosing cholangitis || id:ieu-a-1112	14890	All - Maximum likelihood	0.124905	0.0287539	1.4e-05
	Crohn's disease || id:ieu-a-12	Primary sclerosing cholangitis || id:ieu-a-1112	14890	All - Weighted median	0.114592	0.0495083	0.0206342
	Crohn's disease || id:ieu-a-12	Primary sclerosing cholangitis || id:ieu-a-1112	14890	All - Robust adjusted profile score (RAPS)	0.125826	0.0546701	0.0213601

## Sheet: Table S4
Table S4. “Leave-one-out” sensitivity analysis of causal effects of IBD on PSC.
	exposure	outcome	samplesize	SNP	b	se	p
1	Inflammatory bowel disease || id:ieu-a-294	Primary sclerosing cholangitis || id:ieu-a-1112	14890	rs10142466	0.255881	0.0754369	0.000693871
2	Inflammatory bowel disease || id:ieu-a-294	Primary sclerosing cholangitis || id:ieu-a-1112	14890	rs10758669	0.254814	0.0759415	0.000792514
3	Inflammatory bowel disease || id:ieu-a-294	Primary sclerosing cholangitis || id:ieu-a-1112	14890	rs10800309	0.256151	0.0758212	0.000729199
4	Inflammatory bowel disease || id:ieu-a-294	Primary sclerosing cholangitis || id:ieu-a-1112	14890	rs11152949	0.259275	0.0755835	0.000602903
5	Inflammatory bowel disease || id:ieu-a-294	Primary sclerosing cholangitis || id:ieu-a-1112	14890	rs11230563	0.25622	0.0755598	0.00069651
6	Inflammatory bowel disease || id:ieu-a-294	Primary sclerosing cholangitis || id:ieu-a-1112	14890	rs11677953	0.250878	0.0752505	0.000856355
7	Inflammatory bowel disease || id:ieu-a-294	Primary sclerosing cholangitis || id:ieu-a-1112	14890	rs11691685	0.257799	0.0755093	0.000639851
8	Inflammatory bowel disease || id:ieu-a-294	Primary sclerosing cholangitis || id:ieu-a-1112	14890	rs11713774	0.257965	0.075484	0.000632038
9	Inflammatory bowel disease || id:ieu-a-294	Primary sclerosing cholangitis || id:ieu-a-1112	14890	rs11793497	0.252824	0.0759671	0.000874512
10	Inflammatory bowel disease || id:ieu-a-294	Primary sclerosing cholangitis || id:ieu-a-1112	14890	rs1182188	0.258248	0.0754497	0.000619847
11	Inflammatory bowel disease || id:ieu-a-294	Primary sclerosing cholangitis || id:ieu-a-1112	14890	rs12103	0.260185	0.0752908	0.000548794
12	Inflammatory bowel disease || id:ieu-a-294	Primary sclerosing cholangitis || id:ieu-a-1112	14890	rs12318183	0.255731	0.0757803	0.000739126
13	Inflammatory bowel disease || id:ieu-a-294	Primary sclerosing cholangitis || id:ieu-a-1112	14890	rs12411259	0.258398	0.0754282	0.000613106
14	Inflammatory bowel disease || id:ieu-a-294	Primary sclerosing cholangitis || id:ieu-a-1112	14890	rs1250566	0.259319	0.0755553	0.000598772
15	Inflammatory bowel disease || id:ieu-a-294	Primary sclerosing cholangitis || id:ieu-a-1112	14890	rs12585310	0.254919	0.0754403	0.000727301
16	Inflammatory bowel disease || id:ieu-a-294	Primary sclerosing cholangitis || id:ieu-a-1112	14890	rs1267499	0.25941	0.0754076	0.000581495
17	Inflammatory bowel disease || id:ieu-a-294	Primary sclerosing cholangitis || id:ieu-a-1112	14890	rs12718244	0.258391	0.0755294	0.000623759
18	Inflammatory bowel disease || id:ieu-a-294	Primary sclerosing cholangitis || id:ieu-a-1112	14890	rs12722515	0.253292	0.075364	0.00077684
19	Inflammatory bowel disease || id:ieu-a-294	Primary sclerosing cholangitis || id:ieu-a-1112	14890	rs1292053	0.257184	0.0755161	0.000659978
20	Inflammatory bowel disease || id:ieu-a-294	Primary sclerosing cholangitis || id:ieu-a-1112	14890	rs1297258	0.25748	0.0757986	0.000681528
21	Inflammatory bowel disease || id:ieu-a-294	Primary sclerosing cholangitis || id:ieu-a-1112	14890	rs13107612	0.255018	0.0754762	0.000728083
22	Inflammatory bowel disease || id:ieu-a-294	Primary sclerosing cholangitis || id:ieu-a-1112	14890	rs13204742	0.260769	0.0751512	0.000520604
23	Inflammatory bowel disease || id:ieu-a-294	Primary sclerosing cholangitis || id:ieu-a-1112	14890	rs13407913	0.259597	0.0756258	0.000597704
24	Inflammatory bowel disease || id:ieu-a-294	Primary sclerosing cholangitis || id:ieu-a-1112	14890	rs1363907	0.261661	0.0754131	0.000521036
25	Inflammatory bowel disease || id:ieu-a-294	Primary sclerosing cholangitis || id:ieu-a-1112	14890	rs1388585	0.25843	0.0756164	0.000631649
26	Inflammatory bowel disease || id:ieu-a-294	Primary sclerosing cholangitis || id:ieu-a-1112	14890	rs1420098	0.254618	0.0756396	0.00076212
27	Inflammatory bowel disease || id:ieu-a-294	Primary sclerosing cholangitis || id:ieu-a-1112	14890	rs1517352	0.256402	0.075543	0.000688483
28	Inflammatory bowel disease || id:ieu-a-294	Primary sclerosing cholangitis || id:ieu-a-1112	14890	rs1569328	0.256311	0.0754293	0.000678751
29	Inflammatory bowel disease || id:ieu-a-294	Primary sclerosing cholangitis || id:ieu-a-1112	14890	rs17293632	0.256778	0.0755793	0.000680133
30	Inflammatory bowel disease || id:ieu-a-294	Primary sclerosing cholangitis || id:ieu-a-1112	14890	rs17651741	0.257857	0.0754264	0.000629304
31	Inflammatory bowel disease || id:ieu-a-294	Primary sclerosing cholangitis || id:ieu-a-1112	14890	rs17780256	0.256651	0.0754874	0.000674045
32	Inflammatory bowel disease || id:ieu-a-294	Primary sclerosing cholangitis || id:ieu-a-1112	14890	rs181826	0.257069	0.0755859	0.00067134
33	Inflammatory bowel disease || id:ieu-a-294	Primary sclerosing cholangitis || id:ieu-a-1112	14890	rs1847472	0.265275	0.0745092	0.000370435
34	Inflammatory bowel disease || id:ieu-a-294	Primary sclerosing cholangitis || id:ieu-a-1112	14890	rs1990760	0.253451	0.0752743	0.000759799
35	Inflammatory bowel disease || id:ieu-a-294	Primary sclerosing cholangitis || id:ieu-a-1112	14890	rs2024092	0.262302	0.0752429	0.000490175
36	Inflammatory bowel disease || id:ieu-a-294	Primary sclerosing cholangitis || id:ieu-a-1112	14890	rs2050392	0.255602	0.0754882	0.000709237
37	Inflammatory bowel disease || id:ieu-a-294	Primary sclerosing cholangitis || id:ieu-a-1112	14890	rs2143178	0.25681	0.0760139	0.00072892
38	Inflammatory bowel disease || id:ieu-a-294	Primary sclerosing cholangitis || id:ieu-a-1112	14890	rs2153283	0.257462	0.0755242	0.00065203
39	Inflammatory bowel disease || id:ieu-a-294	Primary sclerosing cholangitis || id:ieu-a-1112	14890	rs2270395	0.254744	0.0753761	0.000725815
40	Inflammatory bowel disease || id:ieu-a-294	Primary sclerosing cholangitis || id:ieu-a-1112	14890	rs2274351	0.25518	0.0754432	0.00071852
41	Inflammatory bowel disease || id:ieu-a-294	Primary sclerosing cholangitis || id:ieu-a-1112	14890	rs2297559	0.253879	0.0753968	0.000759241
42	Inflammatory bowel disease || id:ieu-a-294	Primary sclerosing cholangitis || id:ieu-a-1112	14890	rs2328546	0.262456	0.0752738	0.000489036
43	Inflammatory bowel disease || id:ieu-a-294	Primary sclerosing cholangitis || id:ieu-a-1112	14890	rs2395022	0.256499	0.075502	0.000680676
44	Inflammatory bowel disease || id:ieu-a-294	Primary sclerosing cholangitis || id:ieu-a-1112	14890	rs2497318	0.251381	0.0750991	0.000815948
45	Inflammatory bowel disease || id:ieu-a-294	Primary sclerosing cholangitis || id:ieu-a-1112	14890	rs2538470	0.257201	0.075465	0.00065391
46	Inflammatory bowel disease || id:ieu-a-294	Primary sclerosing cholangitis || id:ieu-a-1112	14890	rs259964	0.253126	0.0752397	0.000767484
47	Inflammatory bowel disease || id:ieu-a-294	Primary sclerosing cholangitis || id:ieu-a-1112	14890	rs2688608	0.258107	0.075469	0.00062612
48	Inflammatory bowel disease || id:ieu-a-294	Primary sclerosing cholangitis || id:ieu-a-1112	14890	rs272882	0.265258	0.0761708	0.000496906
49	Inflammatory bowel disease || id:ieu-a-294	Primary sclerosing cholangitis || id:ieu-a-1112	14890	rs2836883	0.231594	0.0735454	0.00163835
50	Inflammatory bowel disease || id:ieu-a-294	Primary sclerosing cholangitis || id:ieu-a-1112	14890	rs2847278	0.250006	0.0755781	0.000939946
51	Inflammatory bowel disease || id:ieu-a-294	Primary sclerosing cholangitis || id:ieu-a-1112	14890	rs2974935	0.258784	0.075417	0.000600518
52	Inflammatory bowel disease || id:ieu-a-294	Primary sclerosing cholangitis || id:ieu-a-1112	14890	rs3024493	0.260086	0.0759416	0.000615209
53	Inflammatory bowel disease || id:ieu-a-294	Primary sclerosing cholangitis || id:ieu-a-1112	14890	rs3184504	0.245918	0.0735487	0.000826985
54	Inflammatory bowel disease || id:ieu-a-294	Primary sclerosing cholangitis || id:ieu-a-1112	14890	rs34779708	0.253214	0.0756902	0.000821645
55	Inflammatory bowel disease || id:ieu-a-294	Primary sclerosing cholangitis || id:ieu-a-1112	14890	rs34804116	0.254142	0.0752437	0.000731234
56	Inflammatory bowel disease || id:ieu-a-294	Primary sclerosing cholangitis || id:ieu-a-1112	14890	rs35164067	0.255198	0.0755636	0.000732127
57	Inflammatory bowel disease || id:ieu-a-294	Primary sclerosing cholangitis || id:ieu-a-1112	14890	rs35256947	0.256426	0.0754721	0.000679728
58	Inflammatory bowel disease || id:ieu-a-294	Primary sclerosing cholangitis || id:ieu-a-1112	14890	rs3776414	0.259799	0.0754576	0.000575331
59	Inflammatory bowel disease || id:ieu-a-294	Primary sclerosing cholangitis || id:ieu-a-1112	14890	rs3801835	0.257239	0.0754753	0.000653807
60	Inflammatory bowel disease || id:ieu-a-294	Primary sclerosing cholangitis || id:ieu-a-1112	14890	rs4703855	0.258962	0.0753862	0.000592249
61	Inflammatory bowel disease || id:ieu-a-294	Primary sclerosing cholangitis || id:ieu-a-1112	14890	rs4743820	0.25945	0.075379	0.000577567
62	Inflammatory bowel disease || id:ieu-a-294	Primary sclerosing cholangitis || id:ieu-a-1112	14890	rs4795397	0.263549	0.0759884	0.000523793
63	Inflammatory bowel disease || id:ieu-a-294	Primary sclerosing cholangitis || id:ieu-a-1112	14890	rs4976646	0.260178	0.075323	0.000551995
64	Inflammatory bowel disease || id:ieu-a-294	Primary sclerosing cholangitis || id:ieu-a-1112	14890	rs516246	0.247586	0.074692	0.000917235
65	Inflammatory bowel disease || id:ieu-a-294	Primary sclerosing cholangitis || id:ieu-a-1112	14890	rs55808324	0.257472	0.0756082	0.000660804
66	Inflammatory bowel disease || id:ieu-a-294	Primary sclerosing cholangitis || id:ieu-a-1112	14890	rs559928	0.257218	0.0755326	0.000660699
67	Inflammatory bowel disease || id:ieu-a-294	Primary sclerosing cholangitis || id:ieu-a-1112	14890	rs56167332	0.263684	0.0758709	0.000510022
68	Inflammatory bowel disease || id:ieu-a-294	Primary sclerosing cholangitis || id:ieu-a-1112	14890	rs6058869	0.256108	0.0754424	0.000686895
69	Inflammatory bowel disease || id:ieu-a-294	Primary sclerosing cholangitis || id:ieu-a-1112	14890	rs6074022	0.259261	0.075435	0.000588455
70	Inflammatory bowel disease || id:ieu-a-294	Primary sclerosing cholangitis || id:ieu-a-1112	14890	rs6111031	0.253777	0.0765378	0.000914102
71	Inflammatory bowel disease || id:ieu-a-294	Primary sclerosing cholangitis || id:ieu-a-1112	14890	rs62037363	0.254335	0.0756592	0.000774977
72	Inflammatory bowel disease || id:ieu-a-294	Primary sclerosing cholangitis || id:ieu-a-1112	14890	rs62434177	0.257232	0.0754269	0.000648808
73	Inflammatory bowel disease || id:ieu-a-294	Primary sclerosing cholangitis || id:ieu-a-1112	14890	rs6456426	0.254715	0.0753725	0.000726386
74	Inflammatory bowel disease || id:ieu-a-294	Primary sclerosing cholangitis || id:ieu-a-1112	14890	rs648541	0.259475	0.0753997	0.000578869
75	Inflammatory bowel disease || id:ieu-a-294	Primary sclerosing cholangitis || id:ieu-a-1112	14890	rs6561151	0.261033	0.0754782	0.000543418
76	Inflammatory bowel disease || id:ieu-a-294	Primary sclerosing cholangitis || id:ieu-a-1112	14890	rs6584281	0.242193	0.0758974	0.0014175
77	Inflammatory bowel disease || id:ieu-a-294	Primary sclerosing cholangitis || id:ieu-a-1112	14890	rs6588248	0.262035	0.0754214	0.000512218
78	Inflammatory bowel disease || id:ieu-a-294	Primary sclerosing cholangitis || id:ieu-a-1112	14890	rs6651252	0.259063	0.0754312	0.000593803
79	Inflammatory bowel disease || id:ieu-a-294	Primary sclerosing cholangitis || id:ieu-a-1112	14890	rs6708373	0.255916	0.0761169	0.000773383
80	Inflammatory bowel disease || id:ieu-a-294	Primary sclerosing cholangitis || id:ieu-a-1112	14890	rs6740462	0.251093	0.0751074	0.000828408
81	Inflammatory bowel disease || id:ieu-a-294	Primary sclerosing cholangitis || id:ieu-a-1112	14890	rs6745185	0.254161	0.07528	0.000734933
82	Inflammatory bowel disease || id:ieu-a-294	Primary sclerosing cholangitis || id:ieu-a-1112	14890	rs67643815	0.252181	0.0750043	0.000773192
83	Inflammatory bowel disease || id:ieu-a-294	Primary sclerosing cholangitis || id:ieu-a-1112	14890	rs6933404	0.258371	0.0755711	0.00062873
84	Inflammatory bowel disease || id:ieu-a-294	Primary sclerosing cholangitis || id:ieu-a-1112	14890	rs7011507	0.259419	0.0753629	0.000576863
85	Inflammatory bowel disease || id:ieu-a-294	Primary sclerosing cholangitis || id:ieu-a-1112	14890	rs7015630	0.259944	0.0753086	0.000557029
86	Inflammatory bowel disease || id:ieu-a-294	Primary sclerosing cholangitis || id:ieu-a-1112	14890	rs71593329	0.256791	0.0755851	0.000680352
87	Inflammatory bowel disease || id:ieu-a-294	Primary sclerosing cholangitis || id:ieu-a-1112	14890	rs7194886	0.259988	0.0757929	0.000603035
88	Inflammatory bowel disease || id:ieu-a-294	Primary sclerosing cholangitis || id:ieu-a-1112	14890	rs7240004	0.257183	0.075461	0.000654035
89	Inflammatory bowel disease || id:ieu-a-294	Primary sclerosing cholangitis || id:ieu-a-1112	14890	rs7253253	0.258445	0.0753734	0.000606105
90	Inflammatory bowel disease || id:ieu-a-294	Primary sclerosing cholangitis || id:ieu-a-1112	14890	rs72634258	0.260249	0.0756315	0.000579535
91	Inflammatory bowel disease || id:ieu-a-294	Primary sclerosing cholangitis || id:ieu-a-1112	14890	rs72924296	0.257831	0.0754102	0.000628397
92	Inflammatory bowel disease || id:ieu-a-294	Primary sclerosing cholangitis || id:ieu-a-1112	14890	rs744166	0.261278	0.0755998	0.000548119
93	Inflammatory bowel disease || id:ieu-a-294	Primary sclerosing cholangitis || id:ieu-a-1112	14890	rs7523442	0.263664	0.0757505	0.00050012
94	Inflammatory bowel disease || id:ieu-a-294	Primary sclerosing cholangitis || id:ieu-a-1112	14890	rs7547569	0.261763	0.0794705	0.000988303
95	Inflammatory bowel disease || id:ieu-a-294	Primary sclerosing cholangitis || id:ieu-a-1112	14890	rs7608910	0.246765	0.0753118	0.00105073
96	Inflammatory bowel disease || id:ieu-a-294	Primary sclerosing cholangitis || id:ieu-a-1112	14890	rs7657746	0.244433	0.0738404	0.000931998
97	Inflammatory bowel disease || id:ieu-a-294	Primary sclerosing cholangitis || id:ieu-a-1112	14890	rs769177	0.255654	0.0756247	0.000723376
98	Inflammatory bowel disease || id:ieu-a-294	Primary sclerosing cholangitis || id:ieu-a-1112	14890	rs7711427	0.24768	0.0763447	0.00117767
99	Inflammatory bowel disease || id:ieu-a-294	Primary sclerosing cholangitis || id:ieu-a-1112	14890	rs7773324	0.2501	0.0744327	0.000779202
100	Inflammatory bowel disease || id:ieu-a-294	Primary sclerosing cholangitis || id:ieu-a-1112	14890	rs780094	0.260748	0.0754477	0.000548227
101	Inflammatory bowel disease || id:ieu-a-294	Primary sclerosing cholangitis || id:ieu-a-1112	14890	rs7848647	0.259389	0.0759385	0.000636012
102	Inflammatory bowel disease || id:ieu-a-294	Primary sclerosing cholangitis || id:ieu-a-1112	14890	rs79980175	0.262033	0.0752059	0.000493588
103	Inflammatory bowel disease || id:ieu-a-294	Primary sclerosing cholangitis || id:ieu-a-1112	14890	rs8127691	0.246426	0.0753857	0.00107976
104	Inflammatory bowel disease || id:ieu-a-294	Primary sclerosing cholangitis || id:ieu-a-1112	14890	rs913678	0.257624	0.0754573	0.000639781
105	Inflammatory bowel disease || id:ieu-a-294	Primary sclerosing cholangitis || id:ieu-a-1112	14890	rs9264942	0.285942	0.0694184	3.8e-05
106	Inflammatory bowel disease || id:ieu-a-294	Primary sclerosing cholangitis || id:ieu-a-1112	14890	rs9273363	0.325213	0.0656574	7.3e-07
107	Inflammatory bowel disease || id:ieu-a-294	Primary sclerosing cholangitis || id:ieu-a-1112	14890	rs941823	0.258393	0.0754884	0.000619462
108	Inflammatory bowel disease || id:ieu-a-294	Primary sclerosing cholangitis || id:ieu-a-1112	14890	rs9457247	0.259459	0.0756091	0.000600068
109	Inflammatory bowel disease || id:ieu-a-294	Primary sclerosing cholangitis || id:ieu-a-1112	14890	rs9557207	0.251386	0.0751316	0.000820027
110	Inflammatory bowel disease || id:ieu-a-294	Primary sclerosing cholangitis || id:ieu-a-1112	14890	rs974801	0.253232	0.0753734	0.000780278
111	Inflammatory bowel disease || id:ieu-a-294	Primary sclerosing cholangitis || id:ieu-a-1112	14890	rs9836291	0.217175	0.0726067	0.00277965
112	Inflammatory bowel disease || id:ieu-a-294	Primary sclerosing cholangitis || id:ieu-a-1112	14890	rs9889296	0.256564	0.075678	0.00069841
	Inflammatory bowel disease || id:ieu-a-294	Primary sclerosing cholangitis || id:ieu-a-1112	14890	All	0.256963	0.0749902	0.00061113

## Sheet: Table S5
Table S5. “Leave-one-out” sensitivity analysis of causal effects of UC on PSC.
	exposure	outcome	id.exposure	id.outcome	samplesize	SNP	b	se	p
1	Ulcerative colitis || id:ieu-a-970	Primary sclerosing cholangitis || id:ieu-a-1112	ieu-a-970	ieu-a-1112	14890	rs10185424	0.390981	0.0792069	7.97e-07
2	Ulcerative colitis || id:ieu-a-970	Primary sclerosing cholangitis || id:ieu-a-1112	ieu-a-970	ieu-a-1112	14890	rs10460566	0.39117	0.0790583	7.5e-07
3	Ulcerative colitis || id:ieu-a-970	Primary sclerosing cholangitis || id:ieu-a-1112	ieu-a-970	ieu-a-1112	14890	rs10748783	0.379055	0.0796377	1.94e-06
4	Ulcerative colitis || id:ieu-a-970	Primary sclerosing cholangitis || id:ieu-a-1112	ieu-a-970	ieu-a-1112	14890	rs10758669	0.39159	0.0795151	8.45e-07
5	Ulcerative colitis || id:ieu-a-970	Primary sclerosing cholangitis || id:ieu-a-1112	ieu-a-970	ieu-a-1112	14890	rs1077773	0.390456	0.0789511	7.59e-07
6	Ulcerative colitis || id:ieu-a-970	Primary sclerosing cholangitis || id:ieu-a-1112	ieu-a-970	ieu-a-1112	14890	rs10910092	0.380525	0.0778547	1.02e-06
7	Ulcerative colitis || id:ieu-a-970	Primary sclerosing cholangitis || id:ieu-a-1112	ieu-a-970	ieu-a-1112	14890	rs11083840	0.386352	0.0785611	8.75e-07
8	Ulcerative colitis || id:ieu-a-970	Primary sclerosing cholangitis || id:ieu-a-1112	ieu-a-970	ieu-a-1112	14890	rs11150589	0.390825	0.0790387	7.62e-07
9	Ulcerative colitis || id:ieu-a-970	Primary sclerosing cholangitis || id:ieu-a-1112	ieu-a-970	ieu-a-1112	14890	rs111830527	0.388441	0.0790402	8.9e-07
10	Ulcerative colitis || id:ieu-a-970	Primary sclerosing cholangitis || id:ieu-a-1112	ieu-a-970	ieu-a-1112	14890	rs11229555	0.397805	0.0785678	4.12e-07
11	Ulcerative colitis || id:ieu-a-970	Primary sclerosing cholangitis || id:ieu-a-1112	ieu-a-970	ieu-a-1112	14890	rs11230563	0.391651	0.0790502	7.25e-07
12	Ulcerative colitis || id:ieu-a-970	Primary sclerosing cholangitis || id:ieu-a-1112	ieu-a-970	ieu-a-1112	14890	rs11641184	0.386923	0.0788336	9.2e-07
13	Ulcerative colitis || id:ieu-a-970	Primary sclerosing cholangitis || id:ieu-a-1112	ieu-a-970	ieu-a-1112	14890	rs11676348	0.387611	0.0788928	8.96e-07
14	Ulcerative colitis || id:ieu-a-970	Primary sclerosing cholangitis || id:ieu-a-1112	ieu-a-970	ieu-a-1112	14890	rs1182188	0.397037	0.0790716	5.13e-07
15	Ulcerative colitis || id:ieu-a-970	Primary sclerosing cholangitis || id:ieu-a-1112	ieu-a-970	ieu-a-1112	14890	rs12103	0.396984	0.0785765	4.37e-07
16	Ulcerative colitis || id:ieu-a-970	Primary sclerosing cholangitis || id:ieu-a-1112	ieu-a-970	ieu-a-1112	14890	rs12318183	0.396495	0.0799802	7.14e-07
17	Ulcerative colitis || id:ieu-a-970	Primary sclerosing cholangitis || id:ieu-a-1112	ieu-a-970	ieu-a-1112	14890	rs12718244	0.394031	0.0789665	6.04e-07
18	Ulcerative colitis || id:ieu-a-970	Primary sclerosing cholangitis || id:ieu-a-1112	ieu-a-970	ieu-a-1112	14890	rs12720356	0.400286	0.0780045	2.87e-07
19	Ulcerative colitis || id:ieu-a-970	Primary sclerosing cholangitis || id:ieu-a-1112	ieu-a-970	ieu-a-1112	14890	rs1297256	0.39364	0.0792533	6.8e-07
20	Ulcerative colitis || id:ieu-a-970	Primary sclerosing cholangitis || id:ieu-a-1112	ieu-a-970	ieu-a-1112	14890	rs13136827	0.377573	0.0765864	8.22e-07
21	Ulcerative colitis || id:ieu-a-970	Primary sclerosing cholangitis || id:ieu-a-1112	ieu-a-970	ieu-a-1112	14890	rs13255292	0.387444	0.0786073	8.27e-07
22	Ulcerative colitis || id:ieu-a-970	Primary sclerosing cholangitis || id:ieu-a-1112	ieu-a-970	ieu-a-1112	14890	rs13430791	0.394017	0.0789777	6.07e-07
23	Ulcerative colitis || id:ieu-a-970	Primary sclerosing cholangitis || id:ieu-a-1112	ieu-a-970	ieu-a-1112	14890	rs16841904	0.396633	0.0787267	4.7e-07
24	Ulcerative colitis || id:ieu-a-970	Primary sclerosing cholangitis || id:ieu-a-1112	ieu-a-970	ieu-a-1112	14890	rs17780256	0.393181	0.0791567	6.8e-07
25	Ulcerative colitis || id:ieu-a-970	Primary sclerosing cholangitis || id:ieu-a-1112	ieu-a-970	ieu-a-1112	14890	rs1801274	0.393292	0.0798739	8.48e-07
26	Ulcerative colitis || id:ieu-a-970	Primary sclerosing cholangitis || id:ieu-a-1112	ieu-a-970	ieu-a-1112	14890	rs1990760	0.387877	0.0788999	8.83e-07
27	Ulcerative colitis || id:ieu-a-970	Primary sclerosing cholangitis || id:ieu-a-1112	ieu-a-970	ieu-a-1112	14890	rs2274351	0.390475	0.0790517	7.83e-07
28	Ulcerative colitis || id:ieu-a-970	Primary sclerosing cholangitis || id:ieu-a-1112	ieu-a-970	ieu-a-1112	14890	rs2395022	0.391961	0.079023	7.05e-07
29	Ulcerative colitis || id:ieu-a-970	Primary sclerosing cholangitis || id:ieu-a-1112	ieu-a-970	ieu-a-1112	14890	rs2497318	0.385544	0.0785712	9.25e-07
30	Ulcerative colitis || id:ieu-a-970	Primary sclerosing cholangitis || id:ieu-a-1112	ieu-a-970	ieu-a-1112	14890	rs2516440	0.363831	0.0690107	1.35e-07
31	Ulcerative colitis || id:ieu-a-970	Primary sclerosing cholangitis || id:ieu-a-1112	ieu-a-970	ieu-a-1112	14890	rs272882	0.402564	0.0792964	3.84e-07
32	Ulcerative colitis || id:ieu-a-970	Primary sclerosing cholangitis || id:ieu-a-1112	ieu-a-970	ieu-a-1112	14890	rs2836883	0.358351	0.0773043	3.56e-06
33	Ulcerative colitis || id:ieu-a-970	Primary sclerosing cholangitis || id:ieu-a-1112	ieu-a-970	ieu-a-1112	14890	rs3024493	0.400451	0.079594	4.88e-07
34	Ulcerative colitis || id:ieu-a-970	Primary sclerosing cholangitis || id:ieu-a-1112	ieu-a-970	ieu-a-1112	14890	rs34659678	0.39244	0.0792534	7.36e-07
35	Ulcerative colitis || id:ieu-a-970	Primary sclerosing cholangitis || id:ieu-a-1112	ieu-a-970	ieu-a-1112	14890	rs35223180	0.401234	0.078514	3.22e-07
36	Ulcerative colitis || id:ieu-a-970	Primary sclerosing cholangitis || id:ieu-a-1112	ieu-a-970	ieu-a-1112	14890	rs36070529	0.392373	0.0790738	6.97e-07
37	Ulcerative colitis || id:ieu-a-970	Primary sclerosing cholangitis || id:ieu-a-1112	ieu-a-970	ieu-a-1112	14890	rs3774937	0.38141	0.0785192	1.19e-06
38	Ulcerative colitis || id:ieu-a-970	Primary sclerosing cholangitis || id:ieu-a-1112	ieu-a-970	ieu-a-1112	14890	rs3776414	0.395351	0.078808	5.26e-07
39	Ulcerative colitis || id:ieu-a-970	Primary sclerosing cholangitis || id:ieu-a-1112	ieu-a-970	ieu-a-1112	14890	rs4366152	0.396998	0.0792849	5.52e-07
40	Ulcerative colitis || id:ieu-a-970	Primary sclerosing cholangitis || id:ieu-a-1112	ieu-a-970	ieu-a-1112	14890	rs4656958	0.389683	0.079029	8.19e-07
41	Ulcerative colitis || id:ieu-a-970	Primary sclerosing cholangitis || id:ieu-a-1112	ieu-a-970	ieu-a-1112	14890	rs4676410	0.383346	0.0787794	1.14e-06
42	Ulcerative colitis || id:ieu-a-970	Primary sclerosing cholangitis || id:ieu-a-1112	ieu-a-970	ieu-a-1112	14890	rs4712520	0.398978	0.0783756	3.57e-07
43	Ulcerative colitis || id:ieu-a-970	Primary sclerosing cholangitis || id:ieu-a-1112	ieu-a-970	ieu-a-1112	14890	rs4728142	0.383994	0.0785805	1.03e-06
44	Ulcerative colitis || id:ieu-a-970	Primary sclerosing cholangitis || id:ieu-a-1112	ieu-a-970	ieu-a-1112	14890	rs4743820	0.396783	0.0787746	4.73e-07
45	Ulcerative colitis || id:ieu-a-970	Primary sclerosing cholangitis || id:ieu-a-1112	ieu-a-970	ieu-a-1112	14890	rs4747886	0.387107	0.0786188	8.49e-07
46	Ulcerative colitis || id:ieu-a-970	Primary sclerosing cholangitis || id:ieu-a-1112	ieu-a-970	ieu-a-1112	14890	rs4795397	0.402963	0.0793281	3.78e-07
47	Ulcerative colitis || id:ieu-a-970	Primary sclerosing cholangitis || id:ieu-a-1112	ieu-a-970	ieu-a-1112	14890	rs483905	0.390933	0.0790752	7.66e-07
48	Ulcerative colitis || id:ieu-a-970	Primary sclerosing cholangitis || id:ieu-a-1112	ieu-a-970	ieu-a-1112	14890	rs4947328	0.388376	0.0790035	8.84e-07
49	Ulcerative colitis || id:ieu-a-970	Primary sclerosing cholangitis || id:ieu-a-1112	ieu-a-970	ieu-a-1112	14890	rs4973341	0.387025	0.0786684	8.67e-07
50	Ulcerative colitis || id:ieu-a-970	Primary sclerosing cholangitis || id:ieu-a-1112	ieu-a-970	ieu-a-1112	14890	rs4976646	0.396617	0.0786237	4.55e-07
51	Ulcerative colitis || id:ieu-a-970	Primary sclerosing cholangitis || id:ieu-a-1112	ieu-a-970	ieu-a-1112	14890	rs55808324	0.393026	0.0790614	6.66e-07
52	Ulcerative colitis || id:ieu-a-970	Primary sclerosing cholangitis || id:ieu-a-1112	ieu-a-970	ieu-a-1112	14890	rs56167332	0.400744	0.0790811	4.03e-07
53	Ulcerative colitis || id:ieu-a-970	Primary sclerosing cholangitis || id:ieu-a-1112	ieu-a-970	ieu-a-1112	14890	rs59418206	0.388872	0.0789395	8.38e-07
54	Ulcerative colitis || id:ieu-a-970	Primary sclerosing cholangitis || id:ieu-a-1112	ieu-a-970	ieu-a-1112	14890	rs6111031	0.392993	0.080264	9.77e-07
55	Ulcerative colitis || id:ieu-a-970	Primary sclerosing cholangitis || id:ieu-a-1112	ieu-a-970	ieu-a-1112	14890	rs61893460	0.3963	0.0794362	6.07e-07
56	Ulcerative colitis || id:ieu-a-970	Primary sclerosing cholangitis || id:ieu-a-1112	ieu-a-970	ieu-a-1112	14890	rs6426833	0.424137	0.0799633	1.13e-07
57	Ulcerative colitis || id:ieu-a-970	Primary sclerosing cholangitis || id:ieu-a-1112	ieu-a-970	ieu-a-1112	14890	rs661054	0.402387	0.0789804	3.49e-07
58	Ulcerative colitis || id:ieu-a-970	Primary sclerosing cholangitis || id:ieu-a-1112	ieu-a-970	ieu-a-1112	14890	rs6920220	0.39895	0.0793069	4.89e-07
59	Ulcerative colitis || id:ieu-a-970	Primary sclerosing cholangitis || id:ieu-a-1112	ieu-a-970	ieu-a-1112	14890	rs7240004	0.393214	0.0790209	6.49e-07
60	Ulcerative colitis || id:ieu-a-970	Primary sclerosing cholangitis || id:ieu-a-1112	ieu-a-970	ieu-a-1112	14890	rs7404095	0.389201	0.0789481	8.23e-07
61	Ulcerative colitis || id:ieu-a-970	Primary sclerosing cholangitis || id:ieu-a-1112	ieu-a-970	ieu-a-1112	14890	rs7547569	0.400075	0.0816092	9.47e-07
62	Ulcerative colitis || id:ieu-a-970	Primary sclerosing cholangitis || id:ieu-a-1112	ieu-a-970	ieu-a-1112	14890	rs7608910	0.381831	0.0788044	1.26e-06
63	Ulcerative colitis || id:ieu-a-970	Primary sclerosing cholangitis || id:ieu-a-1112	ieu-a-970	ieu-a-1112	14890	rs76546301	0.392495	0.0790465	6.86e-07
64	Ulcerative colitis || id:ieu-a-970	Primary sclerosing cholangitis || id:ieu-a-1112	ieu-a-970	ieu-a-1112	14890	rs76904798	0.393256	0.0790005	6.43e-07
65	Ulcerative colitis || id:ieu-a-970	Primary sclerosing cholangitis || id:ieu-a-1112	ieu-a-970	ieu-a-1112	14890	rs7711427	0.385309	0.0787726	1e-06
66	Ulcerative colitis || id:ieu-a-970	Primary sclerosing cholangitis || id:ieu-a-1112	ieu-a-970	ieu-a-1112	14890	rs7738430	0.394051	0.0795483	7.28e-07
67	Ulcerative colitis || id:ieu-a-970	Primary sclerosing cholangitis || id:ieu-a-1112	ieu-a-970	ieu-a-1112	14890	rs913678	0.393372	0.0789548	6.29e-07
68	Ulcerative colitis || id:ieu-a-970	Primary sclerosing cholangitis || id:ieu-a-1112	ieu-a-970	ieu-a-1112	14890	rs9271255	0.436811	0.0782868	2.41e-08
69	Ulcerative colitis || id:ieu-a-970	Primary sclerosing cholangitis || id:ieu-a-1112	ieu-a-970	ieu-a-1112	14890	rs941823	0.395844	0.0790356	5.49e-07
70	Ulcerative colitis || id:ieu-a-970	Primary sclerosing cholangitis || id:ieu-a-1112	ieu-a-970	ieu-a-1112	14890	rs9611131	0.390203	0.0791454	8.21e-07
71	Ulcerative colitis || id:ieu-a-970	Primary sclerosing cholangitis || id:ieu-a-1112	ieu-a-970	ieu-a-1112	14890	rs9836291	0.347552	0.0749367	3.52e-06
72	Ulcerative colitis || id:ieu-a-970	Primary sclerosing cholangitis || id:ieu-a-1112	ieu-a-970	ieu-a-1112	14890	rs9891119	0.397228	0.0788914	4.78e-07
73	Ulcerative colitis || id:ieu-a-970	Primary sclerosing cholangitis || id:ieu-a-1112	ieu-a-970	ieu-a-1112	14890	rs9941524	0.392129	0.0793117	7.65e-07
	Ulcerative colitis || id:ieu-a-970	Primary sclerosing cholangitis || id:ieu-a-1112	ieu-a-970	ieu-a-1112	14890	All	0.391744	0.0782566	5.56e-07

## Sheet: Table S6
Table S6. “Leave-one-out” sensitivity analysis of causal effects of CD on PSC.
	exposure	outcome	samplesize	SNP	b	se	p
1	Crohn's disease || id:ieu-a-12	Primary sclerosing cholangitis || id:ieu-a-1112	14890	rs10758669	0.115316	0.0659538	0.0803897
2	Crohn's disease || id:ieu-a-12	Primary sclerosing cholangitis || id:ieu-a-1112	14890	rs10798069	0.117802	0.0656927	0.072937
3	Crohn's disease || id:ieu-a-12	Primary sclerosing cholangitis || id:ieu-a-1112	14890	rs10800309	0.117196	0.0656992	0.0744512
4	Crohn's disease || id:ieu-a-12	Primary sclerosing cholangitis || id:ieu-a-1112	14890	rs11117431	0.11694	0.0658609	0.0758064
5	Crohn's disease || id:ieu-a-12	Primary sclerosing cholangitis || id:ieu-a-1112	14890	rs11152949	0.120418	0.0659018	0.0676639
6	Crohn's disease || id:ieu-a-12	Primary sclerosing cholangitis || id:ieu-a-1112	14890	rs11159833	0.118211	0.0657983	0.0724054
7	Crohn's disease || id:ieu-a-12	Primary sclerosing cholangitis || id:ieu-a-1112	14890	rs11691685	0.119226	0.0658013	0.0700003
8	Crohn's disease || id:ieu-a-12	Primary sclerosing cholangitis || id:ieu-a-1112	14890	rs11713774	0.119579	0.0658118	0.0692189
9	Crohn's disease || id:ieu-a-12	Primary sclerosing cholangitis || id:ieu-a-1112	14890	rs11793497	0.113251	0.0660051	0.0861991
10	Crohn's disease || id:ieu-a-12	Primary sclerosing cholangitis || id:ieu-a-1112	14890	rs12411259	0.121123	0.0659283	0.0661821
11	Crohn's disease || id:ieu-a-12	Primary sclerosing cholangitis || id:ieu-a-1112	14890	rs1250573	0.121388	0.0659177	0.0655472
12	Crohn's disease || id:ieu-a-12	Primary sclerosing cholangitis || id:ieu-a-1112	14890	rs1267501	0.120501	0.06566	0.0664715
13	Crohn's disease || id:ieu-a-12	Primary sclerosing cholangitis || id:ieu-a-1112	14890	rs12694846	0.117903	0.0657968	0.0731438
14	Crohn's disease || id:ieu-a-12	Primary sclerosing cholangitis || id:ieu-a-1112	14890	rs1292053	0.118598	0.0658047	0.0715029
15	Crohn's disease || id:ieu-a-12	Primary sclerosing cholangitis || id:ieu-a-1112	14890	rs12949918	0.121122	0.0658292	0.0657775
16	Crohn's disease || id:ieu-a-12	Primary sclerosing cholangitis || id:ieu-a-1112	14890	rs1297258	0.117966	0.0659845	0.0738109
17	Crohn's disease || id:ieu-a-12	Primary sclerosing cholangitis || id:ieu-a-1112	14890	rs13001325	0.1174	0.0659717	0.0751501
18	Crohn's disease || id:ieu-a-12	Primary sclerosing cholangitis || id:ieu-a-1112	14890	rs13407913	0.120551	0.065939	0.0675167
19	Crohn's disease || id:ieu-a-12	Primary sclerosing cholangitis || id:ieu-a-1112	14890	rs1363907	0.122872	0.065747	0.0616426
20	Crohn's disease || id:ieu-a-12	Primary sclerosing cholangitis || id:ieu-a-1112	14890	rs1456896	0.120941	0.0657776	0.0659678
21	Crohn's disease || id:ieu-a-12	Primary sclerosing cholangitis || id:ieu-a-1112	14890	rs1517352	0.117797	0.0657247	0.0730878
22	Crohn's disease || id:ieu-a-12	Primary sclerosing cholangitis || id:ieu-a-1112	14890	rs1569328	0.117889	0.0657035	0.0727717
23	Crohn's disease || id:ieu-a-12	Primary sclerosing cholangitis || id:ieu-a-1112	14890	rs1646019	0.111838	0.0654322	0.0874108
24	Crohn's disease || id:ieu-a-12	Primary sclerosing cholangitis || id:ieu-a-1112	14890	rs17129991	0.121917	0.0656708	0.0633851
25	Crohn's disease || id:ieu-a-12	Primary sclerosing cholangitis || id:ieu-a-1112	14890	rs17293632	0.117988	0.0658268	0.0730688
26	Crohn's disease || id:ieu-a-12	Primary sclerosing cholangitis || id:ieu-a-1112	14890	rs17622378	0.127866	0.066429	0.0542478
27	Crohn's disease || id:ieu-a-12	Primary sclerosing cholangitis || id:ieu-a-1112	14890	rs181826	0.118253	0.0658445	0.0725026
28	Crohn's disease || id:ieu-a-12	Primary sclerosing cholangitis || id:ieu-a-1112	14890	rs1847472	0.126908	0.064847	0.0503425
29	Crohn's disease || id:ieu-a-12	Primary sclerosing cholangitis || id:ieu-a-1112	14890	rs2024092	0.124248	0.0656151	0.0582797
30	Crohn's disease || id:ieu-a-12	Primary sclerosing cholangitis || id:ieu-a-1112	14890	rs212388	0.124148	0.0655079	0.0580714
31	Crohn's disease || id:ieu-a-12	Primary sclerosing cholangitis || id:ieu-a-1112	14890	rs2153283	0.118837	0.0658056	0.0709367
32	Crohn's disease || id:ieu-a-12	Primary sclerosing cholangitis || id:ieu-a-1112	14890	rs2227551	0.122509	0.0655471	0.0616198
33	Crohn's disease || id:ieu-a-12	Primary sclerosing cholangitis || id:ieu-a-1112	14890	rs2270395	0.115742	0.06571	0.0781709
34	Crohn's disease || id:ieu-a-12	Primary sclerosing cholangitis || id:ieu-a-1112	14890	rs2395022	0.118023	0.065684	0.0723635
35	Crohn's disease || id:ieu-a-12	Primary sclerosing cholangitis || id:ieu-a-1112	14890	rs2413583	0.117208	0.0662529	0.0768774
36	Crohn's disease || id:ieu-a-12	Primary sclerosing cholangitis || id:ieu-a-1112	14890	rs2538470	0.118707	0.065701	0.0707979
37	Crohn's disease || id:ieu-a-12	Primary sclerosing cholangitis || id:ieu-a-1112	14890	rs259964	0.115218	0.0653846	0.0780417
38	Crohn's disease || id:ieu-a-12	Primary sclerosing cholangitis || id:ieu-a-1112	14890	rs2641348	0.120188	0.0657063	0.0673735
39	Crohn's disease || id:ieu-a-12	Primary sclerosing cholangitis || id:ieu-a-1112	14890	rs26528	0.115606	0.0657912	0.0788891
40	Crohn's disease || id:ieu-a-12	Primary sclerosing cholangitis || id:ieu-a-1112	14890	rs2974935	0.120087	0.0656728	0.0674637
41	Crohn's disease || id:ieu-a-12	Primary sclerosing cholangitis || id:ieu-a-1112	14890	rs3024505	0.119118	0.0659009	0.0706791
42	Crohn's disease || id:ieu-a-12	Primary sclerosing cholangitis || id:ieu-a-1112	14890	rs303429	0.116859	0.0656697	0.0751591
43	Crohn's disease || id:ieu-a-12	Primary sclerosing cholangitis || id:ieu-a-1112	14890	rs3129871	0.132867	0.0632859	0.0357757
44	Crohn's disease || id:ieu-a-12	Primary sclerosing cholangitis || id:ieu-a-1112	14890	rs3184504	0.108477	0.0635134	0.0876465
45	Crohn's disease || id:ieu-a-12	Primary sclerosing cholangitis || id:ieu-a-1112	14890	rs3197999	0.0961223	0.0631812	0.128166
46	Crohn's disease || id:ieu-a-12	Primary sclerosing cholangitis || id:ieu-a-1112	14890	rs34779708	0.113838	0.0659304	0.0842328
47	Crohn's disease || id:ieu-a-12	Primary sclerosing cholangitis || id:ieu-a-1112	14890	rs34787213	0.122015	0.0658138	0.0637464
48	Crohn's disease || id:ieu-a-12	Primary sclerosing cholangitis || id:ieu-a-1112	14890	rs34804116	0.114972	0.0655514	0.0794437
49	Crohn's disease || id:ieu-a-12	Primary sclerosing cholangitis || id:ieu-a-1112	14890	rs35164067	0.116406	0.0657971	0.0768652
50	Crohn's disease || id:ieu-a-12	Primary sclerosing cholangitis || id:ieu-a-1112	14890	rs35320439	0.118107	0.0657123	0.0722823
51	Crohn's disease || id:ieu-a-12	Primary sclerosing cholangitis || id:ieu-a-1112	14890	rs36016881	0.119267	0.0657723	0.0697819
52	Crohn's disease || id:ieu-a-12	Primary sclerosing cholangitis || id:ieu-a-1112	14890	rs3776414	0.120881	0.0657298	0.0659056
53	Crohn's disease || id:ieu-a-12	Primary sclerosing cholangitis || id:ieu-a-1112	14890	rs3801810	0.119465	0.0658114	0.0694829
54	Crohn's disease || id:ieu-a-12	Primary sclerosing cholangitis || id:ieu-a-1112	14890	rs438475	0.141295	0.0606221	0.0197664
55	Crohn's disease || id:ieu-a-12	Primary sclerosing cholangitis || id:ieu-a-1112	14890	rs4703855	0.120174	0.0656351	0.0671102
56	Crohn's disease || id:ieu-a-12	Primary sclerosing cholangitis || id:ieu-a-1112	14890	rs4795397	0.121635	0.0660457	0.0655217
57	Crohn's disease || id:ieu-a-12	Primary sclerosing cholangitis || id:ieu-a-1112	14890	rs516246	0.106851	0.0649458	0.0999232
58	Crohn's disease || id:ieu-a-12	Primary sclerosing cholangitis || id:ieu-a-1112	14890	rs559928	0.118511	0.065739	0.071428
59	Crohn's disease || id:ieu-a-12	Primary sclerosing cholangitis || id:ieu-a-1112	14890	rs56163845	0.117087	0.0657259	0.0748398
60	Crohn's disease || id:ieu-a-12	Primary sclerosing cholangitis || id:ieu-a-1112	14890	rs6074022	0.120797	0.0657441	0.0661529
61	Crohn's disease || id:ieu-a-12	Primary sclerosing cholangitis || id:ieu-a-1112	14890	rs6111031	0.112524	0.0664547	0.0904083
62	Crohn's disease || id:ieu-a-12	Primary sclerosing cholangitis || id:ieu-a-1112	14890	rs61839660	0.1281	0.0646274	0.0474639
63	Crohn's disease || id:ieu-a-12	Primary sclerosing cholangitis || id:ieu-a-1112	14890	rs640466	0.119327	0.0657342	0.0694782
64	Crohn's disease || id:ieu-a-12	Primary sclerosing cholangitis || id:ieu-a-1112	14890	rs6456426	0.115791	0.0656872	0.0779403
65	Crohn's disease || id:ieu-a-12	Primary sclerosing cholangitis || id:ieu-a-1112	14890	rs6561151	0.122999	0.0659115	0.0620248
66	Crohn's disease || id:ieu-a-12	Primary sclerosing cholangitis || id:ieu-a-1112	14890	rs6651252	0.121321	0.0658426	0.0653892
67	Crohn's disease || id:ieu-a-12	Primary sclerosing cholangitis || id:ieu-a-1112	14890	rs6679677	0.119672	0.065668	0.0683967
68	Crohn's disease || id:ieu-a-12	Primary sclerosing cholangitis || id:ieu-a-1112	14890	rs6702421	0.122025	0.0657381	0.06342
69	Crohn's disease || id:ieu-a-12	Primary sclerosing cholangitis || id:ieu-a-1112	14890	rs6738394	0.111991	0.0650924	0.0853441
70	Crohn's disease || id:ieu-a-12	Primary sclerosing cholangitis || id:ieu-a-1112	14890	rs6738490	0.115575	0.0671671	0.0853026
71	Crohn's disease || id:ieu-a-12	Primary sclerosing cholangitis || id:ieu-a-1112	14890	rs6740462	0.112464	0.0652741	0.0848977
72	Crohn's disease || id:ieu-a-12	Primary sclerosing cholangitis || id:ieu-a-1112	14890	rs6827756	0.114579	0.0654586	0.0800486
73	Crohn's disease || id:ieu-a-12	Primary sclerosing cholangitis || id:ieu-a-1112	14890	rs6908425	0.122288	0.0656389	0.0624569
74	Crohn's disease || id:ieu-a-12	Primary sclerosing cholangitis || id:ieu-a-1112	14890	rs7015630	0.121744	0.065625	0.0635762
75	Crohn's disease || id:ieu-a-12	Primary sclerosing cholangitis || id:ieu-a-1112	14890	rs7085798	0.10353	0.0656495	0.114792
76	Crohn's disease || id:ieu-a-12	Primary sclerosing cholangitis || id:ieu-a-1112	14890	rs7194886	0.122516	0.0667168	0.0663053
77	Crohn's disease || id:ieu-a-12	Primary sclerosing cholangitis || id:ieu-a-1112	14890	rs7236492	0.123251	0.0652706	0.0589848
78	Crohn's disease || id:ieu-a-12	Primary sclerosing cholangitis || id:ieu-a-1112	14890	rs72727394	0.118915	0.0657636	0.0705719
79	Crohn's disease || id:ieu-a-12	Primary sclerosing cholangitis || id:ieu-a-1112	14890	rs727563	0.116714	0.0656405	0.0753905
80	Crohn's disease || id:ieu-a-12	Primary sclerosing cholangitis || id:ieu-a-1112	14890	rs7438704	0.120916	0.0657317	0.0658367
81	Crohn's disease || id:ieu-a-12	Primary sclerosing cholangitis || id:ieu-a-1112	14890	rs7517847	0.119537	0.0682096	0.0796893
82	Crohn's disease || id:ieu-a-12	Primary sclerosing cholangitis || id:ieu-a-1112	14890	rs7608910	0.109723	0.0651679	0.0922414
83	Crohn's disease || id:ieu-a-12	Primary sclerosing cholangitis || id:ieu-a-1112	14890	rs76906269	0.119278	0.0659249	0.0704041
84	Crohn's disease || id:ieu-a-12	Primary sclerosing cholangitis || id:ieu-a-1112	14890	rs7711427	0.104876	0.0669676	0.117332
85	Crohn's disease || id:ieu-a-12	Primary sclerosing cholangitis || id:ieu-a-1112	14890	rs7773324	0.111568	0.0645587	0.0839581
86	Crohn's disease || id:ieu-a-12	Primary sclerosing cholangitis || id:ieu-a-1112	14890	rs7786444	0.118689	0.0657231	0.0709342
87	Crohn's disease || id:ieu-a-12	Primary sclerosing cholangitis || id:ieu-a-1112	14890	rs77981966	0.118852	0.0658472	0.0710796
88	Crohn's disease || id:ieu-a-12	Primary sclerosing cholangitis || id:ieu-a-1112	14890	rs780094	0.122802	0.0658688	0.0622726
89	Crohn's disease || id:ieu-a-12	Primary sclerosing cholangitis || id:ieu-a-1112	14890	rs7848647	0.119104	0.0660853	0.0715013
90	Crohn's disease || id:ieu-a-12	Primary sclerosing cholangitis || id:ieu-a-1112	14890	rs7969592	0.12107	0.0656562	0.0651839
91	Crohn's disease || id:ieu-a-12	Primary sclerosing cholangitis || id:ieu-a-1112	14890	rs79980175	0.124138	0.0655734	0.0583434
92	Crohn's disease || id:ieu-a-12	Primary sclerosing cholangitis || id:ieu-a-1112	14890	rs8127691	0.108198	0.0653317	0.0976934
93	Crohn's disease || id:ieu-a-12	Primary sclerosing cholangitis || id:ieu-a-1112	14890	rs915286	0.119468	0.065704	0.0690227
94	Crohn's disease || id:ieu-a-12	Primary sclerosing cholangitis || id:ieu-a-1112	14890	rs9264942	0.155512	0.0597682	0.00927051
95	Crohn's disease || id:ieu-a-12	Primary sclerosing cholangitis || id:ieu-a-1112	14890	rs9457247	0.120804	0.0659989	0.0671918
96	Crohn's disease || id:ieu-a-12	Primary sclerosing cholangitis || id:ieu-a-1112	14890	rs9491892	0.123153	0.0655548	0.0602952
97	Crohn's disease || id:ieu-a-12	Primary sclerosing cholangitis || id:ieu-a-1112	14890	rs9554587	0.113075	0.0651571	0.0826667
98	Crohn's disease || id:ieu-a-12	Primary sclerosing cholangitis || id:ieu-a-1112	14890	rs9594766	0.122492	0.0655199	0.0615481
99	Crohn's disease || id:ieu-a-12	Primary sclerosing cholangitis || id:ieu-a-1112	14890	rs9889296	0.11749	0.066028	0.075174
	Crohn's disease || id:ieu-a-12	Primary sclerosing cholangitis || id:ieu-a-1112	14890	All	0.118897	0.0652496	0.0684267
